# Supplementary material
Source: PubMed Central journal article supplement (PMC2426913)
Supplement: mmc1.pdf [file mmc1.pdf]

## Supplemental Data

### Structural Variation of Chromosomes

#### in Autism Spectrum Disorder

Christian R. Marshall, Abdul Noor, John B. Vincent, Anath C. Lionel, Lars Feuk, Jennifer Skaug, Mary Shago, Rainald Moessner, Dalila Pinto, Yan Ren, Bhooma Thiruvahindrapduram, Andreas Fiebig, Stefan Schreiber, Jan Friedman, Cees E.J. Ketelaars, Yvonne J. Vos, Can Ficicioglu, Susan Kirkpatrick, Rob Nicolson, Leon Sloman, Anne Summers, Clare A. Gibbons, Ahmad Teebi, David Chitayat, Rosanna Weksberg, Anne Thompson, Cathy Vardy, Vicki Crosbie, Sandra Luscombe, Rebecca Baatjes, Lonnie Zwaigenbaum, Wendy Roberts, Bridget Fernandez, Peter Szatmari, and Stephen W. Scherer

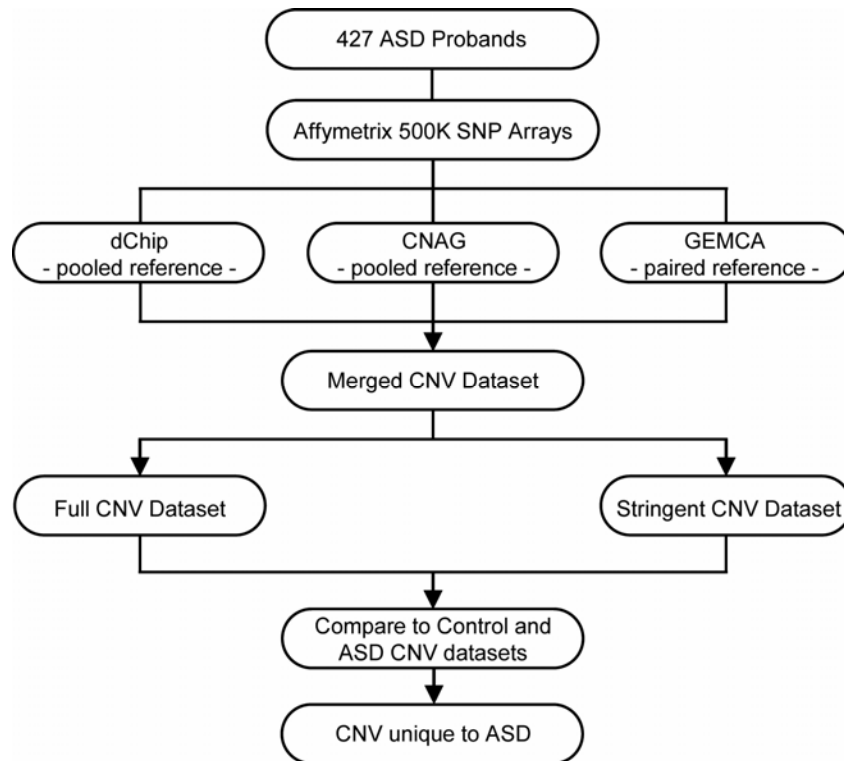

**Figure S1.** Flow Chart for CNV Analyses of 427 Unrelated-ASD Cases

DNA samples were genotyped using the Affymetrix 500K arrays and analyzed for CNV content using dChip, CNAG, and GEMCA (see Materials and Methods and Table 1 for details). For dChip and CNAG *Nspl* and *Styl* arrays were analyzed separately, whereas for GEMCA the *Nspl* and *Styl* arrays were merged before CNV analysis. We detected a merged (*Nspl* and *Styl*) average of 3.0, 5.6, and 5.5 CNVs with dChip, CNAG and GEMCA, respectively. Results from the three algorithms were merged into a unique full CNV dataset (see Table 1 for statistics). A high confidence stringent dataset was defined as one in which a CNV was detected by 2 or more algorithms or on both arrays. Both the full and stringent dataset were compared to controls (see Materials and Methods) to define CNVs unique to ASD (see Table 1 and Figure 2).

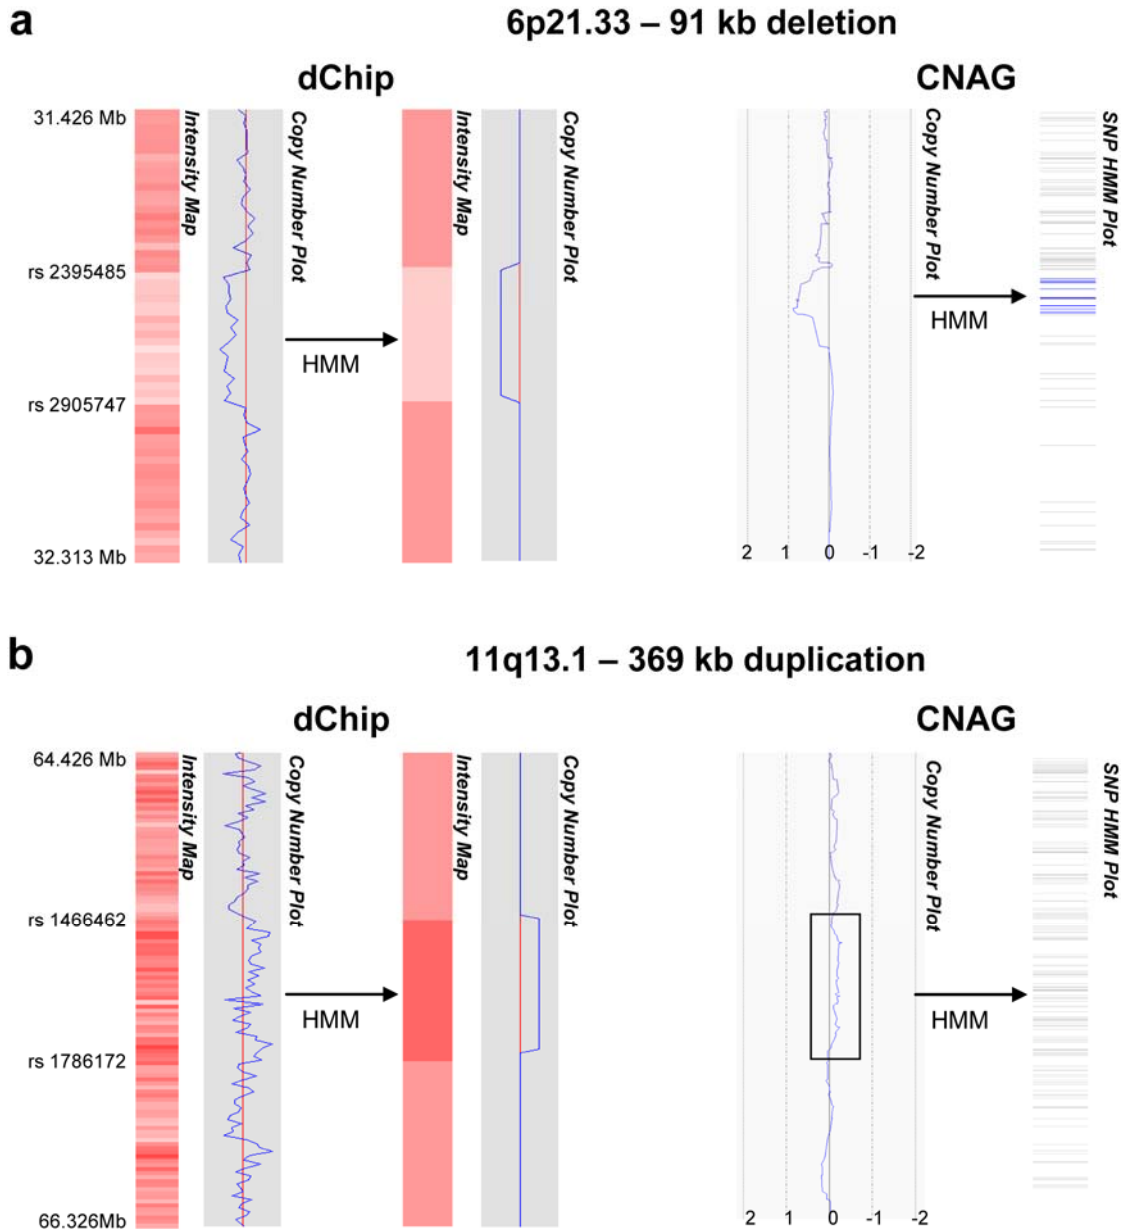

**Figure S2.** CNV Calling of Stringent versus Nonstringent Data

A 90 kb deletion was called by both dChip and CNAG (a) whereas a 369 kb duplication was only called by dChip (b). For dChip displays, a SNP intensity heat map (red = copy gain; white = copy loss) is accompanied by a raw copy number plot (blue). For CNAG, a  $\log_2$  intensity plot of copy number is shown (blue). For both dChip and CNAG the actual copy number is inferred from the underlying raw copy number using a Hidden Markov model (HMM). The HMM calls in (a) agree with the underlying raw intensities whereas the dChip duplication call in (b) is likely a false positive resulting from noisy underlying data (box depicts the approximate location of the dChip CNV call). Genomic coordinates are from NCBI Build 35 and SNPs are depicted as 'rs' numbers from NCBI (Build 35).

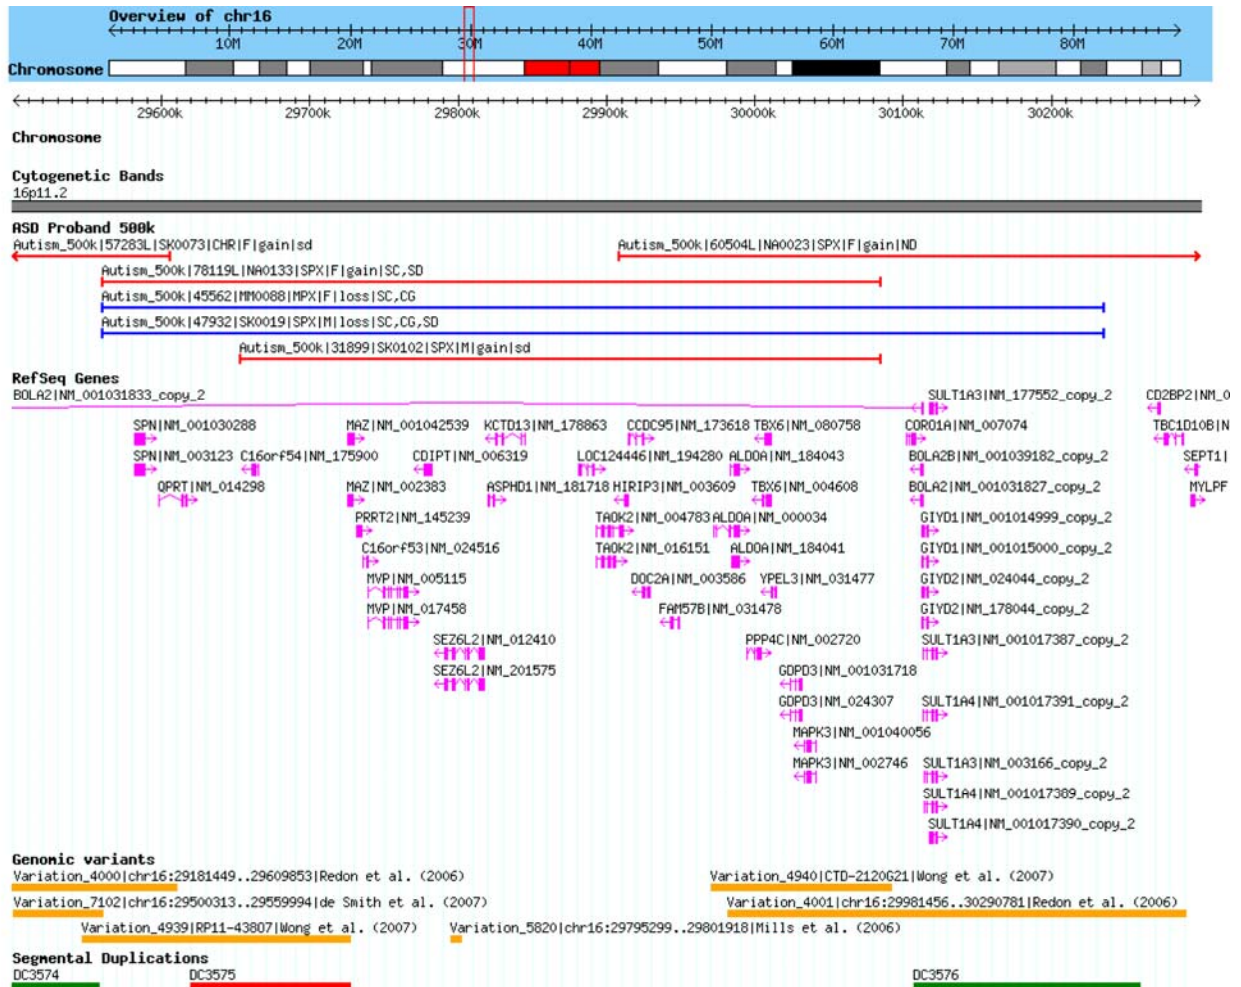

**Figure S3.** The Chromosome 16p11.2 Region as Depicted in the Autism Chromosome Rearrangement Database

The red box on chromosome ideogram shows approximate location of region (top) with scaled coordinates (NCBI Build 35) and cytogenetic band (below). CNV deletions (blue) and gains (red) are shown for ASD probands overlapping genes (pink). CNV found in healthy individuals (orange) is from the Database of Genomic Variants, with tags denoting study origin. Segmental duplications are depicted as being either inter-(red) or intra-(green) chromosomal.

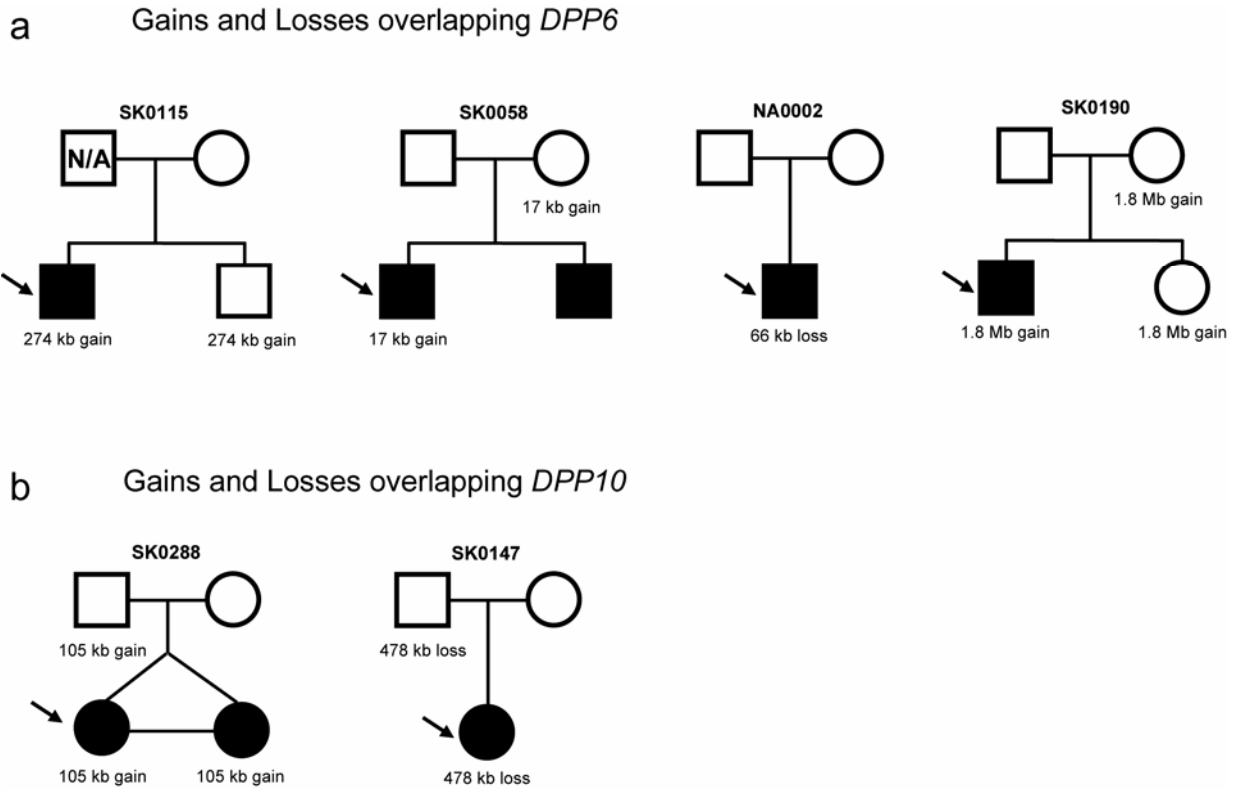

**Figure S4.** *DPP6* and *DPP10* CNVs

Overlapping gains and losses were found at *DPP6* (a) and *DPP10* (b), are shown. Males are denoted by squares and females by circles. The estimated size of each *de novo* or inherited event is shown below each family member. Arrows denote probands, open shapes are unaffected, filled have ASD diagnosis, and grey denotes developmental delay but not a definitive ASD diagnosis. Diamonds indicate number of older unaffected siblings of unspecified gender.

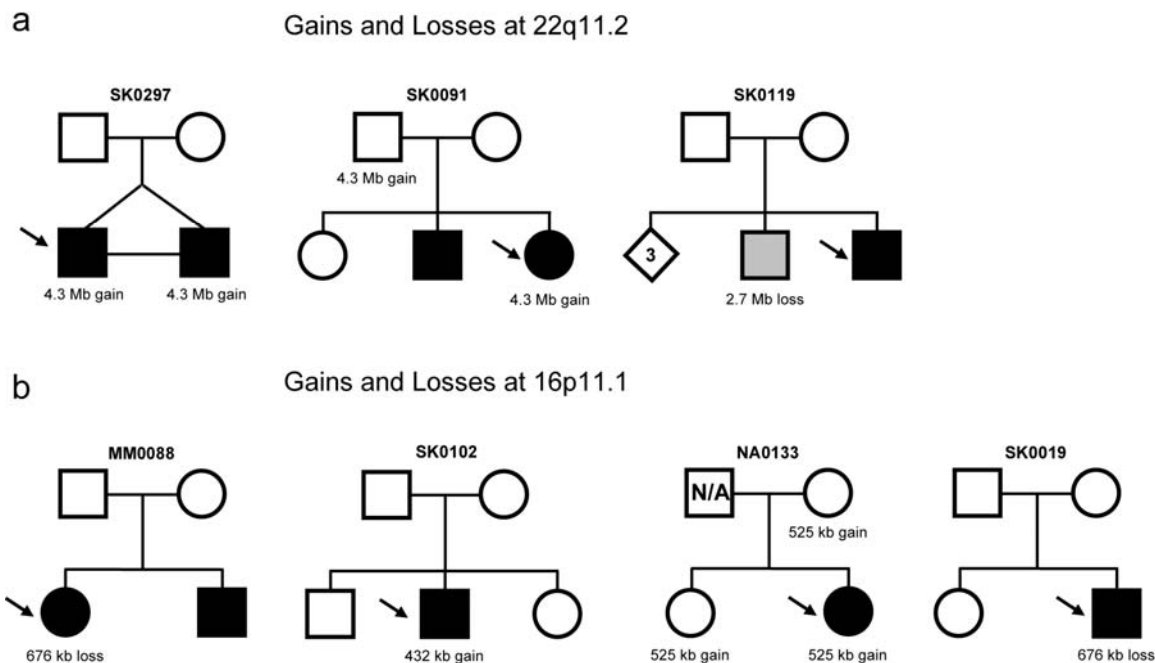

**Figure S5.** Chromosome 22q11.2 and 16p11.2 CNVs

Overlapping gains and losses were found at 22q11.2 (a), 16p11.2 (b), are shown. Males are denoted by squares and females by circles. The estimated size of each *de novo* or inherited event is shown below each family member. Arrows denote probands, open shapes are unaffected, filled have ASD diagnosis, and grey denotes developmental delay but not a definitive ASD diagnosis. Diamonds indicate number of older unaffected siblings of unspecified gender. Note that SK0119-003 originally entered the study with an ASD diagnosis but upon re-examination after CNV detection was assessed to be below cutoffs for ASD.

**Table S1.** Cohort Breakdown by Institution and Family Type

| Site        |     | The Hospital for Sick Children | McMaster University | Memorial University | Other Sites <sup>1</sup> | Total <sup>2</sup> |
|-------------|-----|--------------------------------|---------------------|---------------------|--------------------------|--------------------|
| Family Type | SPX | 9                              | 0                   | 4                   | 11                       | 24                 |
|             | MPX | 5                              | 0                   | 0                   | 3                        | 8                  |
| Non-CHR     | SPX | 132                            | 7                   | 75                  | 0                        | 214                |
|             | MPX | 82                             | 92                  | 7                   | 0                        | 181                |
| ALL         |     | 228                            | 99                  | 86                  | 14                       | 427                |

<sup>1</sup>Other sites refer to those 14 cases imported into the study because they already had known chromosome rearrangements.

<sup>2</sup>Analysis of population ancestry using STRUCTURE revealed ~90% (386/427) of probands were mainly of European origin, while 4.5% (19/427) were of European-mixed origin, 4.5% (19/427) were mainly of Asian origin and 0.07% (3/427) were mainly of African origin. Probands were clustered without regards to their original geographical origin using 780 unlinked SNPs, assuming three ancestral populations, and using 209 unrelated HapMap individuals (African, European and Asian) as reference in the same clustering.

**Table S2.** CNV in ASD Probands with Abnormal Karyotypes

|                   | Sample ID  | Phenotype/Family type                                                                                                                                  | Cytogenetic Analysis                                       |                                                                          |                                 | CNV Analysis |           |                           |                         |                               |                | Comments                                                                           |
|-------------------|------------|--------------------------------------------------------------------------------------------------------------------------------------------------------|------------------------------------------------------------|--------------------------------------------------------------------------|---------------------------------|--------------|-----------|---------------------------|-------------------------|-------------------------------|----------------|------------------------------------------------------------------------------------|
|                   |            |                                                                                                                                                        | Karyotype                                                  | Breakpoint Location                                                      | RefSeq Genes                    | Chr          | CNV       | Size (bp)                 | Location                | AS/Str <sup>a</sup>           | RefSeq Genes   |                                                                                    |
| 1                 | NA0008-000 | Simplex family<br>ASD, developmental dyspraxia                                                                                                         | 46, XX, t(2;6)(q32;p22)<br>Inheritance unknown             | 2q33.1: 200,096,682 – 200,154,790<br><br>6p22.3: 21,561,566 – 21,644,040 | SATB2<br><br>No known genes     | 2p11.2       | Loss      | 917,200                   | 89,056,400-89,973,600   | No/NS                         | No known genes |                                                                                    |
| 6p21.33           |            |                                                                                                                                                        |                                                            |                                                                          |                                 | Gain         | 54,600    | 30,134,300-30,188,900     | Yes/NS                  | ZNRD1, PPP1R11, RNF39, TRIM31 |                |                                                                                    |
| 11p13             |            |                                                                                                                                                        |                                                            |                                                                          |                                 | Gain         | 54,200    | 35,332,700-35,386,900     | No/NS                   | SLC1A2                        |                |                                                                                    |
| 13q21.33          |            |                                                                                                                                                        |                                                            |                                                                          |                                 | Loss         | 28,200    | 69,642,500 - 69,670,700   | No/NS                   | No known genes                |                |                                                                                    |
| 14q11.2           |            |                                                                                                                                                        |                                                            |                                                                          |                                 | Gain         | 549,300   | 21,490,300-22,039,600     | No/NS                   | No known genes                |                |                                                                                    |
|                   |            |                                                                                                                                                        |                                                            |                                                                          |                                 |              |           | 106,152,000 - 106,216,000 | No/NS                   | No known genes                |                |                                                                                    |
| 2                 | NA0005-000 | Simplex family<br>ASD, seizure disorder, obesity, macrocephaly                                                                                         | 46,XX,t(4;5)(q21;q13)<br>Inheritance unknown               | 4q21.3<br><br>5q14.2-q14.3: 82,802,678 – 91,285,973                      | Several<br><br>Several          | 1p13.2       | Gain      | 128,963                   | 112,783,876-112,912,839 | Yes/NS                        | ST7L, CAPZA1   |                                                                                    |
| 2q37.3            |            |                                                                                                                                                        |                                                            |                                                                          |                                 | Loss         | 602,914   | 242,127,468-242,730,382   | No/S                    | 10 genes                      |                |                                                                                    |
| 3q29              |            |                                                                                                                                                        |                                                            |                                                                          |                                 | Loss         | 43,033    | 196,922,636-196,965,669   | No/NS                   | MUC20, MUC4                   |                |                                                                                    |
| 5q15              |            |                                                                                                                                                        |                                                            |                                                                          |                                 | Loss         | 48,627    | 97,076,449-97,125,076     | No/NS                   | No known genes                |                |                                                                                    |
| 5q21.3            |            |                                                                                                                                                        |                                                            |                                                                          |                                 | Loss         | 13,000    | 109,391,000-109,404,000   | Yes/NS                  | No known genes                |                |                                                                                    |
| 8p23.1            |            |                                                                                                                                                        |                                                            |                                                                          |                                 | Gain         | 448,146   | 12,039,387-12,487,533     | No/S                    | FAM86B1, DEFB130, LOC440053   |                |                                                                                    |
| 14q11.2           |            |                                                                                                                                                        |                                                            |                                                                          |                                 | Gain         | 223,579   | 19,272,965-19,496,544     | No/S                    | 6 OR genes                    |                |                                                                                    |
| 14q11.2           |            |                                                                                                                                                        |                                                            |                                                                          |                                 | Gain         | 650,430   | 21,407,981-22,058,411     | No/S                    | No known genes                |                |                                                                                    |
| 15q11.2           | Gain       | 1,642,961                                                                                                                                              | 18,446,422-20,089,383                                      | No/NS                                                                    | LOC283755, POTE15, OR4M2, OR4N4 |              |           |                           |                         |                               |                |                                                                                    |
| 3                 | NA0039-000 | Simplex family<br>ASD, submucous cleft, globally developmentally delayed, large ears, short forehead, distally tapered fingers, severe pes planovalgus | 46,XX,der(22)t(14;22)(q32;q13) pat<br>Paternal inheritance | See CNV                                                                  | See CNV                         | 9q32         | Gain      | 498,000                   | 114,038,000-114,536,000 | No/NS                         | 7 genes        | See Table 2<br><br>Unaffected sibling with ADHD has 46,XX,der(14)t(14;22)(q32;q13) |
| 14q32.33          |            |                                                                                                                                                        |                                                            |                                                                          |                                 | Gain         | 1,436,000 | 104,920,000-106,356,000   | No/NS                   | 6 genes                       |                |                                                                                    |
| 15q13.3           |            |                                                                                                                                                        |                                                            |                                                                          |                                 | Gain         | 502,500   | 29,796,300-30,298,800     | No/NS                   | CHRNA7                        |                |                                                                                    |
| 22q13.31 – q31.33 |            |                                                                                                                                                        |                                                            |                                                                          |                                 | Loss         | 3,231,700 | 46,277,400-49,509,100     | Yes/NS                  | 40 genes + SHANK3             |                |                                                                                    |
| 4                 | SK0283-003 | Simplex family<br>ASD                                                                                                                                  | 47,XX, ring chromosome 1<br>de novo                        | See CNV                                                                  | See CNV                         | 1p22.3       | Gain      | 23,993                    | 87,417,351-87,441,344   | Yes/NS                        | No known genes | See Table 2                                                                        |
| 1q21.2-q21.3      |            |                                                                                                                                                        |                                                            |                                                                          |                                 | Gain         | 1,451,926 | 148,095,537-149,547,463   | Yes/S                   | 36 genes                      |                |                                                                                    |
| 3p26.1            |            |                                                                                                                                                        |                                                            |                                                                          |                                 | Loss         | 44,458    | 5,365,506-5,409,964       | Yes/S                   | No known genes                |                |                                                                                    |
| 4p13              |            |                                                                                                                                                        |                                                            |                                                                          |                                 | Gain         | 95,508    | 44,762,996-44,858,504     | Yes/S                   | No known genes                |                |                                                                                    |
| 4q33              |            |                                                                                                                                                        |                                                            |                                                                          |                                 | Loss         | 82,224    | 171,715,627-171,797,851   | Yes/NS                  | No known genes                |                |                                                                                    |
| 5q31.3            |            |                                                                                                                                                        |                                                            |                                                                          |                                 | Loss         | 355,649   | 140,658,658-141,014,307   | Yes/NS                  | 6 genes                       |                |                                                                                    |
| 6p12.3            |            |                                                                                                                                                        |                                                            |                                                                          |                                 | Gain         | 13,950    | 46,962,122-46,976,072     | No/NS                   | GPR116                        |                |                                                                                    |
| 7p14.1            |            |                                                                                                                                                        |                                                            |                                                                          |                                 | Loss         | 102,939   | 38,041,635-38,144,574     | No/NS                   | STARD3NL, TARP                |                |                                                                                    |
| 7q34              |            |                                                                                                                                                        |                                                            |                                                                          |                                 | Loss         | 169,191   | 141,813,948-141,983,139   | No/NS                   | PRSS1                         |                |                                                                                    |
| 14q11.2           |            |                                                                                                                                                        |                                                            |                                                                          |                                 | Loss         | 583,148   | 21,455,546-22,038,694     | No/S                    | No known genes                |                |                                                                                    |
| 15q11.2           |            |                                                                                                                                                        |                                                            |                                                                          |                                 | Loss         | 1,632,769 | 18,427,103-20,059,872     | No/S                    | LOC283755, POTE15, OR4M2,     |                |                                                                                    |

AJHG, Volume 82

|   |            |                                                                                                                                                                                                                  |                                                                                         |                                                                                                                    |                                                  |                                                                                                                                           |                                                                                              |                                                                                                                                  |                                                                                                                                                                                                                                                                                                               |                                                                                                      |                                                                                                                                                                                  |                                                                                                                                                                                                                                                                                                                                                             | OR4N4                                                                                                                     |
|---|------------|------------------------------------------------------------------------------------------------------------------------------------------------------------------------------------------------------------------|-----------------------------------------------------------------------------------------|--------------------------------------------------------------------------------------------------------------------|--------------------------------------------------|-------------------------------------------------------------------------------------------------------------------------------------------|----------------------------------------------------------------------------------------------|----------------------------------------------------------------------------------------------------------------------------------|---------------------------------------------------------------------------------------------------------------------------------------------------------------------------------------------------------------------------------------------------------------------------------------------------------------|------------------------------------------------------------------------------------------------------|----------------------------------------------------------------------------------------------------------------------------------------------------------------------------------|-------------------------------------------------------------------------------------------------------------------------------------------------------------------------------------------------------------------------------------------------------------------------------------------------------------------------------------------------------------|---------------------------------------------------------------------------------------------------------------------------|
|   |            |                                                                                                                                                                                                                  |                                                                                         |                                                                                                                    |                                                  | 17q21.31                                                                                                                                  | Loss                                                                                         | 140,746                                                                                                                          | 41,570,665-41,711,411                                                                                                                                                                                                                                                                                         | No/NS                                                                                                |                                                                                                                                                                                  | KIAA1267                                                                                                                                                                                                                                                                                                                                                    |                                                                                                                           |
| 5 | SK0044-003 | Simplex family<br>ASD                                                                                                                                                                                            | 46, XY, t(1;2)(p22.1;p23)pat<br>der(13;15)(q10;q10)mat<br>Maternal/Paternal inheritance | 1p31.1 : 72,065,578 – 72,163,007<br>2p24.3 : 12,376,807 – 12,733,637<br>13q10 : in progress<br>15q10 : in progress | NEGR1<br>No known genes                          | 7p14.1                                                                                                                                    | Gain                                                                                         | 85,900                                                                                                                           | 39,828,000-39,913,900                                                                                                                                                                                                                                                                                         | No/NS                                                                                                |                                                                                                                                                                                  | CDC2L5                                                                                                                                                                                                                                                                                                                                                      |                                                                                                                           |
| 6 | SK0182-003 | Simplex family<br>ASD                                                                                                                                                                                            | 46 XY, t(1;9)(q25;p13)<br>Inherited                                                     | 1q24.2: 167,452,268 - 167,522,136<br>9p12: 45,695,701 – 45,737,008                                                 | No known genes<br>No known genes                 | 2p24.3<br>14q11.2                                                                                                                         | Gain<br>Gain                                                                                 | 15,100<br>288,100                                                                                                                | 14,304,500-14,319,600<br>19,204,300-19,492,400                                                                                                                                                                                                                                                                | No/NS<br>No/S                                                                                        | No known genes<br>6 genes                                                                                                                                                        |                                                                                                                                                                                                                                                                                                                                                             | Younger sister has the same translocation and severe speech and language disorder but does not meet ASD criteria on ADOS. |
| 7 | SK0335-003 | Simplex Family<br>ASD, mental retardation                                                                                                                                                                        | 46,XX,t(2;10)(q22;q22.3)<br>Inheritance unknown                                         | 2q23.1: 148,938,284 – 149,125,547<br>10q23.31: 91,265,490 – 91,461,660                                             | LOC401431, ATP6VOE2<br>SLC16A12, PANK1, MPHOSPH1 | 2p13.3<br>3q29<br>5p13.1<br>6p21.32<br>8p23.1<br>9q32<br>14q11.2<br>15q11.2<br>16p11.2-11.1<br>17q21.31<br>20p12.1                        | Gain<br>Gain<br>Loss<br>Gain<br>Gain<br>Gain<br>Gain<br>Gain<br>Gain<br>Gain<br>Loss         | 374,900<br>43,033<br>272,618<br>162,900<br>21,783<br>22,000<br>331,503<br>1,516,085<br>266,336<br>201,731<br>27,500              | 70,152,900-70,527,800<br>196,922,636-196,965,669<br>38,534,384-38,807,002<br>32,344,099-32,506,999<br>12,264,620-12,286,403<br>114,153,000-114,175,000<br>21,717,112-22,048,615<br>18,427,100-19,943,185<br>34,325,041-34,591,377<br>41,518,102-41,719,833<br>14,973,800 - 15,001,300                         | Yes/NS<br>No/NS<br>Yes/S<br>Yes/NS<br>No/NS<br>No/S<br>No/S<br>No/NS<br>No/S<br>Yes/S                | 6 genes<br>MUC20, MUC4<br>LIFR<br>C6orf10, BTNL2<br>No known genes<br>ORM1, ORM2<br>No known genes<br>LOC283755, POTE15, OR4M2, OR4N4<br>No known genes<br>KIAA1267<br>C20orf133 | Non-Canadian family                                                                                                                                                                                                                                                                                                                                         |                                                                                                                           |
| 8 | SK0126-003 | Multiplex family<br>ASD                                                                                                                                                                                          | 46,XY, t(2;11)(p11.2;q13.3) pat<br>Paternal inheritance                                 | 2p11.2: 89,117,655 - 89,158,494<br>11q13.1: 64,821,333 - 64,861,285                                                | No known genes<br>POLA2, CDC42EP2, DPF2          | 2q34                                                                                                                                      | Loss                                                                                         | 3,000                                                                                                                            | 213,013,000 - 213,016,000                                                                                                                                                                                                                                                                                     | Yes/NS                                                                                               |                                                                                                                                                                                  | ERBB4                                                                                                                                                                                                                                                                                                                                                       |                                                                                                                           |
| 9 | SK0152-003 | Multiplex family<br>ASD, oral motor apraxia, poor balance and coordination, mild hypotonia, walks with a wide gait, severe language delay, moderate intellectual disability, some facial features of Cri du Chat | 46, XY, inv(3)(p24;q24), t(5;7)(p15p13)<br>de novo                                      | 3p24 : not available<br>3q24: not available<br>5p14.3 : 19,825,926 – 19,883,410<br>7p13: 46,618,434 - 46,733,542   | No known genes<br>CDH18<br>No known genes        | 3p25.1-p24.3<br>3p12.3<br>5p15.31 – p15.2<br>6q16.1<br>7p14.1<br>10q11.22<br>12p11.21<br>12q12<br>14q11.2<br>14q32.33<br>15q11.2<br>16q21 | Loss<br>Gain<br>Loss<br>Loss<br>Gain<br>Gain<br>Loss<br>Gain<br>Gain<br>Gain<br>Loss<br>Loss | 1,409,600<br>55,000<br>3,429,389<br>60,058<br>35,243<br>455,130<br>63,728<br>422,842<br>491,397<br>22,269<br>1,632,718<br>91,432 | 15,125,800-16,535,400<br>78,902,000 - 78,957,000<br>9,275,811 – 12,705,200<br>95,556,287-95,616,345<br>38,096,725-38,131,968<br>47,030,119-47,485,249<br>31,904,362-31,968,090<br>40,584,198-41,007,040<br>21,584,229-22,075,626<br>106,223,861-106,246,130<br>18,446,422-20,079,140<br>63,768,909-63,860,341 | Yes/S<br>Yes/S<br>Yes/S<br>No/S<br>No/NS<br>No/S<br>No/S<br>Yes/S<br>No/S<br>No/NS<br>No/S<br>Yes/NS | 12 genes<br>ROBO1<br>8 genes<br>No known genes<br>No known genes<br>ANXA8<br>No known genes<br>YAF2, ZCRB1<br>No known genes<br>LOC283755, POTE15, OR4M2, No known genes         | Previously described in a manuscript by Harvard <i>et al</i> . The 3p25.1, 5p15.31-p15.2 and 18q12.2 deletions were identified using BAC CGH. The deletion size has been refined here using SNPs.<br>Older sibling also has ASD but has a normal 46,XX karyotype<br>Maternal aunt with schizophrenia and a maternal uncle with Down syndrome<br>See Table 2 |                                                                                                                           |

AJHG, Volume 82

|    |            |                                                                             |                                                     |                                                                                                                  |                                                                         |                 |      |            |                           |        |                                                   |                                                                                                                                                                                                                                                                            |
|----|------------|-----------------------------------------------------------------------------|-----------------------------------------------------|------------------------------------------------------------------------------------------------------------------|-------------------------------------------------------------------------|-----------------|------|------------|---------------------------|--------|---------------------------------------------------|----------------------------------------------------------------------------------------------------------------------------------------------------------------------------------------------------------------------------------------------------------------------------|
|    |            |                                                                             |                                                     |                                                                                                                  |                                                                         | 17q21.31        | Gain | 219,797    | 41,500,036-41,719,833     | No/NS  | KIAA1267                                          |                                                                                                                                                                                                                                                                            |
|    |            |                                                                             |                                                     |                                                                                                                  |                                                                         | 18q12.2         | Loss | 816,914    | 32,174,061-32,990,975     | Yes/S  | KIAA1328, C18orf10, FHOD3                         |                                                                                                                                                                                                                                                                            |
| 10 | SK0105-003 | Multiplex family<br>ASD, primarily non-verbal, profound developmental delay | 46,XY,inv(4)(p12;p15.3)mat<br>Maternal inheritance  | 4p15.3: 12,173,445 - 12,335,572<br><br>4p12: 44,876,353 - 46,024,486                                             | No known genes<br><br>GABRG1 (breakpoint region is located in intron 7) | 10q11.21        | Gain | 1,098,400  | 41,956,500-43,054,900     | Yes/NS | RET, RASGEF1A, BMS1L, ZNF11B, MGC16291, GALNACT-2 | Described previously in Vincent <i>et al.</i> <sup>2</sup> Affected brother, apparently unaffected mother and unaffected maternal grandfather all have the same inversion. Distal 4p15.3 breakpoint maps ~12Mb to a region previously indicated to show linkage to autism. |
|    |            |                                                                             |                                                     |                                                                                                                  |                                                                         | 13q14.2         | Gain | 162,300    | 47,414,800 - 47,577,100   | Yes/NS | MED4, NUDT15, SUCLA2                              |                                                                                                                                                                                                                                                                            |
|    |            |                                                                             |                                                     |                                                                                                                  |                                                                         | 16q21           | Loss | 56,600     | 61,854,900-61,911,500     | Yes/NS | No known genes                                    |                                                                                                                                                                                                                                                                            |
|    |            |                                                                             |                                                     |                                                                                                                  |                                                                         | 17q21.31        | Gain | 238,600    | 41,521,600-41,760,200     | No/NS  | KIAA1267                                          |                                                                                                                                                                                                                                                                            |
| 11 | SK0205-004 | Simplex family<br>ASD                                                       | 46,XX,del(5)(p15.1)<br>de novo                      | See CNV                                                                                                          | See CNV                                                                 | 3q29            | Gain | 96,068     | 199,226,000-199,322,068   | No/NS  | LMLN, LOC348840                                   | See Table 2<br><br>FISH analysis with subtelomeric probe (containing D5S2488) was consistent with a terminal deletion on 5p.                                                                                                                                               |
|    |            |                                                                             |                                                     |                                                                                                                  |                                                                         | 5p15.33 - p15.2 | Loss | 13,800,984 | 81,949 - 13,882,933       | Yes/S  | >50 genes                                         |                                                                                                                                                                                                                                                                            |
|    |            |                                                                             |                                                     |                                                                                                                  |                                                                         | 5q15            | Loss | 70,891     | 97,054,185-97,125,076     | No/NS  | No known genes                                    |                                                                                                                                                                                                                                                                            |
|    |            |                                                                             |                                                     |                                                                                                                  |                                                                         | 10q11.22        | Gain | 1,121,866  | 46,363,383 - 47,485,249   | No/S   | SYT15, ANXA8, ANXA8L1, PPYR1, GPRIN2              |                                                                                                                                                                                                                                                                            |
|    |            |                                                                             |                                                     |                                                                                                                  |                                                                         | 10q21.3         | Loss | 29,732     | 67,747,770-67,777,502     | No/NS  | CTNNA3                                            |                                                                                                                                                                                                                                                                            |
|    |            |                                                                             |                                                     |                                                                                                                  |                                                                         | 10q26.3         | Gain | 244,432    | 135,079,000-135,323,432   | No/S   | SYCE1;CYP2E1                                      |                                                                                                                                                                                                                                                                            |
|    |            |                                                                             |                                                     |                                                                                                                  |                                                                         | 14q11.2         | Gain | 217,035    | 19,272,965-19,490,000     | No/S   | OR4K1, OR4N2, OR4K5, OR4K2                        |                                                                                                                                                                                                                                                                            |
|    |            |                                                                             |                                                     |                                                                                                                  |                                                                         | 15q11.2         | Gain | 1,662,300  | 18,427,100-20,089,400     | No/S   | LOC283755, POTE15, OR4M2, OR4N4                   |                                                                                                                                                                                                                                                                            |
|    |            |                                                                             |                                                     |                                                                                                                  |                                                                         | 17q21.31        | Gain | 65,845     | 41,006,823-41,072,668     | No/S   | No known genes                                    |                                                                                                                                                                                                                                                                            |
|    |            |                                                                             |                                                     |                                                                                                                  |                                                                         | 17q21.31        | Gain | 187,028    | 41,521,621-41,708,649     | No/NS  | KIAA1267                                          |                                                                                                                                                                                                                                                                            |
|    |            |                                                                             |                                                     |                                                                                                                  |                                                                         | 22q11.21        | Gain | 150,753    | 17,265,500-17,416,253     | No/S   | DGCR6, PRODH, DGCR2                               |                                                                                                                                                                                                                                                                            |
| 12 | SK0061-003 | Simplex family<br>ASD, developmental delay                                  | 46, XY, t(5;7)(q15;q31.32)<br>Inheritance unknown   | 7q31.31: 118,928,065 - 119,006,076<br><br>5q14.3: 88,849,193 - 88,891,151                                        | No known genes<br><br>No known genes                                    | No CNV detected |      |            |                           |        | Non-Canadian Family                               |                                                                                                                                                                                                                                                                            |
| 13 | SK0195-003 | Simplex family<br>ASD                                                       | 46,XY,t(5;8;17)(q31.1;q24.1;q21.3)<br>de novo       | 5q31.1: 136,979,583 - 137,038,092<br>8q24.22: 132,448,049 - 132,512,973<br><br>17q21.31: 41,893,216 - 42,093,636 | KLHL3<br><br>No known genes<br><br>LRRC37A2, ARL17P1, LOC641522, NSF    | 2p16.1          | Gain | 47,900     | 57,314,000-57,361,900     | No/NS  | No known genes                                    | See Table 2                                                                                                                                                                                                                                                                |
|    |            |                                                                             |                                                     |                                                                                                                  |                                                                         | 10q23.1         | Loss | 17,500     | 83,772,000-83,789,500     | Yes/NS | NRG                                               |                                                                                                                                                                                                                                                                            |
|    |            |                                                                             |                                                     |                                                                                                                  |                                                                         | 14q11.2         | Gain | 288,100    | 19,204,300-19,492,400     | No/NS  | OR4K1, OR4N2, OR4M1, OR4K5, OR4Q3, OR4K2          |                                                                                                                                                                                                                                                                            |
|    |            |                                                                             |                                                     |                                                                                                                  |                                                                         | 17q21.31        | Gain | 644,700    | 41,521,600-42,166,300     | No/S   | KIAA1267                                          |                                                                                                                                                                                                                                                                            |
| 14 | SK0133-003 | Simplex family<br>ASD                                                       | 46,XY, t(6;7)(p11.2;q22)pat<br>Paternal inheritance | 6p12.1: 56,805,919 - 56,967,398<br><br>7q22.1: 97,933,646 - 97,973,368                                           | DST, c6orf65<br><br>No known genes                                      | 2q37.1          | Gain | 314,000    | 232,076,000 - 232,390,000 | Yes/NS | MGC43122, NMUR1, MGC35154, NCL, B3GNT7            | CNV seen at 11q25 is in the same breakpoint region as SK0145-003                                                                                                                                                                                                           |
|    |            |                                                                             |                                                     |                                                                                                                  |                                                                         | 5q14.3          | Gain | 633,400    | 89,492,800-90,126,200     | Yes/NS | CETN3, LOC153364, POLR3G, MASS1                   |                                                                                                                                                                                                                                                                            |
|    |            |                                                                             |                                                     |                                                                                                                  |                                                                         | 7q33            | Loss | 3,000      | 136,255,000-136,258,000   | No/NS  | No known genes                                    |                                                                                                                                                                                                                                                                            |
|    |            |                                                                             |                                                     |                                                                                                                  |                                                                         | 8q23.2          | Loss | 32,000     | 111,182,000 - 111,214,000 | No/NS  | No known genes                                    |                                                                                                                                                                                                                                                                            |
|    |            |                                                                             |                                                     |                                                                                                                  |                                                                         | 9p21.3          | Loss | 8,200      | 25,073,900                | Yes/NS | No known genes                                    |                                                                                                                                                                                                                                                                            |



AJHG, Volume 82

|    |            |                                                                                                                                                                                           |                                                                            |                                                                         |                                                                                                                          |                                                                                                                                      |                                                                                      |                                                                                                                                   |                                                                                                                                                                                                                                                                                                                  |                                                                                                 |                                                                                                                                                                                                                                                                       |                                                                 |
|----|------------|-------------------------------------------------------------------------------------------------------------------------------------------------------------------------------------------|----------------------------------------------------------------------------|-------------------------------------------------------------------------|--------------------------------------------------------------------------------------------------------------------------|--------------------------------------------------------------------------------------------------------------------------------------|--------------------------------------------------------------------------------------|-----------------------------------------------------------------------------------------------------------------------------------|------------------------------------------------------------------------------------------------------------------------------------------------------------------------------------------------------------------------------------------------------------------------------------------------------------------|-------------------------------------------------------------------------------------------------|-----------------------------------------------------------------------------------------------------------------------------------------------------------------------------------------------------------------------------------------------------------------------|-----------------------------------------------------------------|
|    |            |                                                                                                                                                                                           |                                                                            |                                                                         |                                                                                                                          |                                                                                                                                      |                                                                                      |                                                                                                                                   | 25,082,100                                                                                                                                                                                                                                                                                                       |                                                                                                 |                                                                                                                                                                                                                                                                       |                                                                 |
|    |            |                                                                                                                                                                                           |                                                                            |                                                                         |                                                                                                                          | 11q25                                                                                                                                | Gain                                                                                 | 369,000                                                                                                                           | 133,855,000 - 134,224,000                                                                                                                                                                                                                                                                                        | No/S                                                                                            | No known genes                                                                                                                                                                                                                                                        |                                                                 |
|    |            |                                                                                                                                                                                           |                                                                            |                                                                         |                                                                                                                          | 12q21.33                                                                                                                             | Gain                                                                                 | 19,700                                                                                                                            | 90,807,700 - 90,827,400                                                                                                                                                                                                                                                                                          | Yes/NS                                                                                          | No known genes                                                                                                                                                                                                                                                        |                                                                 |
|    |            |                                                                                                                                                                                           |                                                                            |                                                                         |                                                                                                                          | 13q21.32                                                                                                                             | Loss                                                                                 | 2,500                                                                                                                             | 65,576,300 - 65,578,800                                                                                                                                                                                                                                                                                          | Yes/NS                                                                                          | No known genes                                                                                                                                                                                                                                                        |                                                                 |
| 15 | SK0043-003 | Multiplex family<br>ASD                                                                                                                                                                   | 46,XY,t(6;9)(q10;q12)<br>Inheritance unknown                               | 6q11.2-q12: 63,464,452 - 63,511,410<br>9q21.11: 68,599,032 - 68,682,365 | No known genes<br><i>PIP5K1B</i>                                                                                         | 8p23.2<br>15q11.2                                                                                                                    | Loss<br>Gain                                                                         | 35,040<br>1,713,200                                                                                                               | 3,984,190-4,019,230<br>18,376,200 - 20,089,400                                                                                                                                                                                                                                                                   | No/NS<br>No/S                                                                                   | <i>CSMD1</i><br><i>LOC283755, POTE15, OR4M2, OR4N4</i>                                                                                                                                                                                                                | Sibling also has ASD but a normal 46,XY karyotype               |
| 16 | SK0181-004 | Simplex family<br>ASD                                                                                                                                                                     | 46,XY,t(6;14)(q13;q21)<br>de novo                                          | 6q12: 69,241,818-69,279,457<br>14q21.1-q21.2: 40,807,716 - 44,806,460   | No known genes<br><i>LRFN5, c14orf155, c14orf28, BTBD5, KIAA0423, PRPF39, FKBP3, AK093422, KIAA1596,FANCM, c14orf106</i> | 3p14.1 - p13<br>4q28.3                                                                                                               | Loss<br>Loss                                                                         | 5,346,900<br>254,000                                                                                                              | 65,286,300-70,633,200<br>135,282,000 - 135,536,000                                                                                                                                                                                                                                                               | Yes/S<br>No/NS                                                                                  | 13 genes<br>No known genes                                                                                                                                                                                                                                            | See Table 2                                                     |
| 17 | SK0083-003 | Simplex family<br>ASD, craniosynostosis, developmental verbal dyspraxia, motor delay                                                                                                      | 46, XY, del(7)(q31.1q31.32)<br>de novo                                     | 7q31.1: 108,272,363 - 108,337,904<br>7q31.31: 119,007,999 - 119,335,246 | <i>IMMP2L, LRRN3, DOCK4, ZNF277P, IFRD1 ... to ... ASZ1, CFTR, CTTNBP2, LSM8, ANKRD7</i>                                 | 1q31.1<br>2p23.3<br>4q35.2<br>6p24.2<br>7q31.1 - q31.31<br>7q36.2<br>8q24.21<br>10p11.23<br>14q11.2<br>17q21.31                      | Loss<br>Gain<br>Gain<br>Gain<br>Loss<br>Loss<br>Gain<br>Gain<br>Loss<br>Loss         | 15,000<br>26,300<br>21,314<br>188,500<br>11,023,506<br>26,297<br>48,000<br>26,700<br>219,458<br>117,521                           | 186,702,000 - 186,717,000<br>25,138,000-25,164,300<br>188,232,000 - 188,253,314<br>11,479,600-11,668,100<br>108,200,381-119,223,887<br>152,027,450-152,053,747<br>127,951,000 - 127,999,000<br>30,893,400 - 30,920,100<br>19,272,965-19,492,423<br>40,897,617-41,015,138                                         | No/S<br>Yes/NS<br>Yes/S<br>Yes/NS<br>Yes/S<br>Yes/NS<br>Yes/NS<br>Yes/NS<br>No/S<br>No/NS       | No known genes<br>No known genes<br>No known genes<br>No known genes<br>>50 genes<br>No known genes<br>No known genes<br>No known genes<br>No known genes<br><i>OR4K1, OR4N2, OR4M1, OR4K5, OR4Q3, OR4K2</i><br><i>PLEKHM1</i>                                        | See Table 2<br>Described previously in Feuk et al. <sup>3</sup> |
| 18 | SK0131-003 | Simplex family<br>Autistic features, speech-language disorder (developmental verbal dyspraxia), dysmorphic features, mild developmental delay, unable to cough/sneeze/laugh spontaneously | 46, XX, del(7)(q31.2q32.2)(D7S486-, D7S522-) de novo, WBS inv-2<br>de novo | 7q31.1: 113,181,975 - 113,518,235<br>7q32.2: 128,540,690 - 128,796,716  | <i>FOXP2, MDFIC, TFEC, TES, CAV2, CAV1...to...IRF5, TNPO3, TSPAN33, SMO, FAM40B, KIAA0828</i>                            | 2p22.2<br>3p21.31<br>4q31.21<br>7p14.1<br>7q31.1-q32.2<br>8q13.3<br>10q11.22<br>10q26.2<br>13q21.33<br>14q11.2<br>14q11.2<br>15q11.2 | Gain<br>Gain<br>Gain<br>Gain<br>Loss<br>Gain<br>Gain<br>Gain<br>Loss<br>Loss<br>Gain | 67,740<br>52,599<br>120,171<br>147,076<br>15,486,721<br>261,985<br>455,100<br>91,077<br>44,235<br>222,786<br>637,249<br>1,662,280 | 37,848,232-37,915,972<br>147,754,068-147,806,667<br>145,146,000-145,266,171<br>38,096,725-38,243,801<br>113,335,000-128,821,721<br>72,881,221-73,143,206<br>47,030,100-47,485,200<br>128,501,014-128,592,091<br>69,634,065-69,678,300<br>19,272,965-19,495,751<br>21,462,466-22,099,715<br>18,427,103-20,089,383 | No/NS<br>Yes/NS<br>No/S<br>No/NS<br>Yes/S<br>Yes/NS<br>No/NS<br>Yes/S<br>No/NS<br>No/NS<br>No/S | No known genes<br><i>CCR5, CCRL2, CCR2</i><br><i>GYPE</i><br><i>AMPH</i><br>>50 genes<br><i>MSC, TRPA1</i><br><i>ANXA8</i><br><i>DOCK1</i><br>No known genes<br><i>OR4K1, OR4N2, OR4M1, OR4K5, OR4Q3, OR4K2</i><br>No known genes<br><i>LOC283755, POTE15, OR4M2,</i> | See Table 2<br>Described previously in Feuk et al. <sup>3</sup> |

AJHG, Volume 82

| Case ID        | Family Type | Clinical Description                                                                                           | Cytogenetic Abnormality                                           | Gene(s)        | Chromosome | Copy Number | Size (kb) | Start (kb)              | End (kb)                | Expression            | OR4N4          | Notes                                                                                                                                       |                                                                                                                                                                                                                                      |
|----------------|-------------|----------------------------------------------------------------------------------------------------------------|-------------------------------------------------------------------|----------------|------------|-------------|-----------|-------------------------|-------------------------|-----------------------|----------------|---------------------------------------------------------------------------------------------------------------------------------------------|--------------------------------------------------------------------------------------------------------------------------------------------------------------------------------------------------------------------------------------|
|                |             |                                                                                                                |                                                                   |                |            |             |           |                         |                         |                       | No known genes |                                                                                                                                             |                                                                                                                                                                                                                                      |
| 19             | SK0002-003  | Simplex family<br>ASD, psychosis                                                                               | 46,XX,inv(7)(p15.3;q22.1)<br>Inheritance unknown                  | No known genes | 4q28.3     | Gain        | 29,984    | 31,471,515-31,501,499   | 132,195,000-132,960,000 | No/NS                 | No known genes | Non Canadian-Family                                                                                                                         |                                                                                                                                                                                                                                      |
|                |             |                                                                                                                |                                                                   |                |            |             |           |                         |                         |                       | 6 genes        |                                                                                                                                             |                                                                                                                                                                                                                                      |
|                |             |                                                                                                                |                                                                   |                |            |             |           |                         |                         |                       | No known genes |                                                                                                                                             |                                                                                                                                                                                                                                      |
| 20             | SK0211-003  | Simplex family<br>ASD, mild elevation of lactate                                                               | 46,XX,inv(7)(q22q34)mat<br>Maternal Inheritance                   | No known genes | 7q22.1     | Gain        | 379,000   | 100,393,000-100,772,000 | 30,408,400-30,543,500   | No/NS                 | 10 genes       | Non Canadian Family<br>Mother and unaffected twin sister have the same karyotype; 7q34 breakpoint overlaps with a ASD translocation patient |                                                                                                                                                                                                                                      |
|                |             |                                                                                                                |                                                                   |                |            |             |           |                         |                         |                       | No known genes |                                                                                                                                             |                                                                                                                                                                                                                                      |
|                |             |                                                                                                                |                                                                   |                |            |             |           |                         |                         |                       | No known genes |                                                                                                                                             |                                                                                                                                                                                                                                      |
| 21             | SK0040-003  | Multiplex family<br>ASD, ADHD, severe anxiety attacks, seizures, difficulties with fine and gross motor skills | 46, XY, t(7;8)(p15;q22), t(10;11)(q26;q23)<br>Inheritance unknown | No known genes | 2q37.3     | Loss        | 95,959    | 242,634,423-242,730,382 | 67,734,600-67,879,503   | 19,272,965-19,492,423 | No/S           | No known genes                                                                                                                              | Non-Canadian Family<br>Unaffected sister with normal female karyotype, has difficulties in some muscles, difficulties with fine and gross motor skills, severe anxiety attacks, not able to relate to peers and is affected by noise |
|                |             |                                                                                                                |                                                                   |                |            |             |           |                         |                         |                       |                | CTNNA3                                                                                                                                      |                                                                                                                                                                                                                                      |
|                |             |                                                                                                                |                                                                   |                |            |             |           |                         |                         |                       |                | No known genes                                                                                                                              |                                                                                                                                                                                                                                      |
|                |             |                                                                                                                |                                                                   |                |            |             |           |                         |                         |                       |                | OR4K2, OR4N2, OR4K1, OR4K5                                                                                                                  |                                                                                                                                                                                                                                      |
|                |             |                                                                                                                |                                                                   |                |            |             |           |                         |                         |                       |                | No known genes                                                                                                                              |                                                                                                                                                                                                                                      |
|                |             |                                                                                                                |                                                                   |                |            |             |           |                         |                         |                       |                | LOC283755, POTE15, OR4M2, OR4N4                                                                                                             |                                                                                                                                                                                                                                      |
|                |             |                                                                                                                |                                                                   |                |            |             |           |                         |                         |                       |                | PRAME, SUHW2, SUHW1, GGT4                                                                                                                   |                                                                                                                                                                                                                                      |
| 22             | SK0145-003  | Simplex family<br>ASD                                                                                          | 46, XX, t(7;11)(q31;q25)mat<br>Maternal inheritance               | No known genes | 1p36.11    | Gain        | 192,600   | 26,231,500-26,424,100   | 72,911,162-72,940,095   | Yes/NS                | 8 genes        | Apparently unaffected mother has the same 7q31.2 and 11q25 breakpoints                                                                      |                                                                                                                                                                                                                                      |
| No known genes |             |                                                                                                                |                                                                   |                |            |             |           |                         |                         |                       |                |                                                                                                                                             |                                                                                                                                                                                                                                      |
| No known genes |             |                                                                                                                |                                                                   |                |            |             |           |                         |                         |                       |                |                                                                                                                                             |                                                                                                                                                                                                                                      |
| 28 genes       |             |                                                                                                                |                                                                   |                |            |             |           |                         |                         |                       |                |                                                                                                                                             |                                                                                                                                                                                                                                      |
| LRRC16         |             |                                                                                                                |                                                                   |                |            |             |           |                         |                         |                       |                |                                                                                                                                             |                                                                                                                                                                                                                                      |
| No known genes |             |                                                                                                                |                                                                   |                |            |             |           |                         |                         |                       |                |                                                                                                                                             |                                                                                                                                                                                                                                      |
| MSC            |             |                                                                                                                |                                                                   |                |            |             |           |                         |                         |                       |                |                                                                                                                                             |                                                                                                                                                                                                                                      |
| No known genes |             |                                                                                                                |                                                                   |                |            |             |           |                         |                         |                       |                |                                                                                                                                             |                                                                                                                                                                                                                                      |
| PTCHD3         |             |                                                                                                                |                                                                   |                |            |             |           |                         |                         |                       |                |                                                                                                                                             |                                                                                                                                                                                                                                      |
| No known genes |             |                                                                                                                |                                                                   |                |            |             |           |                         |                         |                       |                |                                                                                                                                             |                                                                                                                                                                                                                                      |
| 9 genes        |             |                                                                                                                |                                                                   |                |            |             |           |                         |                         |                       |                |                                                                                                                                             |                                                                                                                                                                                                                                      |
| 18 genes       |             |                                                                                                                |                                                                   |                |            |             |           |                         |                         |                       |                |                                                                                                                                             |                                                                                                                                                                                                                                      |
| 23             | SK0031-003  | Simplex family<br>ASD, very little language, global developmental delays                                       | 46, XY, t(7;13)(q31.3;q21)mat<br>Maternal inheritance             | No known genes | 7q31.2     | Loss        | 3,000     | 36,495,800 - 36,498,800 | 29,967,200-30,046,800   | Yes/NS                | No known genes | Non Canadian Family                                                                                                                         |                                                                                                                                                                                                                                      |
|                |             |                                                                                                                |                                                                   |                |            |             |           |                         |                         |                       | No known genes |                                                                                                                                             |                                                                                                                                                                                                                                      |
|                |             |                                                                                                                |                                                                   |                |            |             |           |                         |                         |                       | No known genes |                                                                                                                                             |                                                                                                                                                                                                                                      |

AJHG, Volume 82

|    |            |                                                                                        |                                                           |                                                                     |                                                                                     |  |               |      |            |                         |        |                                             |
|----|------------|----------------------------------------------------------------------------------------|-----------------------------------------------------------|---------------------------------------------------------------------|-------------------------------------------------------------------------------------|--|---------------|------|------------|-------------------------|--------|---------------------------------------------|
|    |            |                                                                                        |                                                           |                                                                     |                                                                                     |  |               |      | 12,008,400 |                         |        |                                             |
|    |            |                                                                                        |                                                           | 54,739,454                                                          |                                                                                     |  | 14q32.2       | Gain | 772,400    | 99,015,100-99,787,500   | Yes/S  | 8 genes                                     |
|    |            |                                                                                        |                                                           |                                                                     |                                                                                     |  | 15q11.2       | Gain | 1,378,000  | 18,711,400-20,089,400   | No/S   | LOC283755, POTE15, OR4M2, OR4N4             |
|    |            |                                                                                        |                                                           |                                                                     |                                                                                     |  | 17q21.31      | Gain | 597,300    | 41,569,000-42,166,300   | No/NS  | 6 genes                                     |
|    |            |                                                                                        |                                                           |                                                                     |                                                                                     |  | 22q11.23      | Gain | 251,200    | 23,989,000-24,240,200   | No/S   | CTA-246H3.1, LRP5L                          |
| 24 | SK0073-003 | Simplex family<br>ASD, developmental delay, delayed expressive and receptive language  | 47,XX,idelic(15)q13<br>de novo                            | 15q13: 28,918,525 – 31,848,963                                      | LOC400968, LOC283755, POTE15, OR4M2, OR4N4...to...ARHGA P11A, c15orf45, GREM1, RYR3 |  | 1q25.2        | Gain | 424,000    | 176,522,000-176,946,000 | Yes/NS | 6 genes                                     |
|    |            |                                                                                        |                                                           |                                                                     |                                                                                     |  | 2p23.3        | Gain | 703,500    | 24,701,300-25,404,800   | Yes/NS | 7 genes                                     |
|    |            |                                                                                        |                                                           |                                                                     |                                                                                     |  | 4p16.3        | Gain | 997,460    | 1,692,240-2,689,700     | Yes/NS | 12 genes                                    |
|    |            |                                                                                        |                                                           |                                                                     |                                                                                     |  | 4q35.1        | Gain | 311,000    | 185,856,000-186,167,000 | Yes/NS | CASP3, CCDC111, MLF1IP, ACSL1               |
|    |            |                                                                                        |                                                           |                                                                     |                                                                                     |  | 5q31.1        | Gain | 93,000     | 134,426,000-134,519,000 | Yes/S  | No known genes                              |
|    |            |                                                                                        |                                                           |                                                                     |                                                                                     |  | 9p21.1        | Loss | 362,900    | 30,452,800-30,815,700   | Yes/NS | No known genes                              |
|    |            |                                                                                        |                                                           |                                                                     |                                                                                     |  | 14q11.2       | Gain | 414,900    | 21,660,700-22,075,600   | No/NS  | No known genes                              |
|    |            |                                                                                        |                                                           |                                                                     |                                                                                     |  | 15q11.2-13.3  | Gain | 11,922,600 | 18,376,200-30,298,800   | Yes/S  | >50 genes                                   |
|    |            |                                                                                        |                                                           |                                                                     |                                                                                     |  | 16p11.2       | Gain | 1,543,900  | 28,062,200-29,606,100   | No/NS  | >20 genes                                   |
|    |            |                                                                                        |                                                           |                                                                     |                                                                                     |  | 16p11.2       | Gain | 658,600    | 30,589,900-31,248,500   | No/NS  | >20 genes                                   |
| 25 | SK0218-003 | Multiplex family<br>ASD, cleft palate, club feet, mild-facial hypoplasia, heart defect | 46,XX,del(18)(q21)<br>de novo                             | 18q21.32: 55,690,398-55,884,029                                     | See CNV                                                                             |  | 12p13.33      | Loss | 92,328     | 1,760,084-1,852,412     | Yes/S  | CACNA2D4, ADIPOR2, LRMT2                    |
|    |            |                                                                                        |                                                           |                                                                     |                                                                                     |  | 15q11.2       | Loss | 1,613,450  | 18,446,422-20,059,872   | No/S   | LOC283755, POTE15, OR4M2, OR4N4             |
|    |            |                                                                                        |                                                           |                                                                     |                                                                                     |  | 17q21.31      | Gain | 190,234    | 41,518,415-41,708,649   | No/NS  | KIAA1267                                    |
|    |            |                                                                                        |                                                           |                                                                     |                                                                                     |  | 18q21.32-q23  | Loss | 20,358,999 | 55,756,601-76,115,600   | Yes/S  | >50 genes                                   |
|    |            |                                                                                        |                                                           |                                                                     |                                                                                     |  | 19q13.42      | Loss | 68,786     | 59,971,717-60,040,503   | No/NS  | KIR3DP1, KIR2DL1, KIR3DL1, KIR2DL4, KIR2DS4 |
|    |            |                                                                                        |                                                           |                                                                     |                                                                                     |  | 20p11.23      | Gain | 128,457    | 19,740,012-19,868,469   | Yes/NS | RIN2                                        |
| 26 | SK0215-006 | Simplex family<br>ASD                                                                  | 46,XY,t(19;21)(p13.2;q22.12)<br>Inherited                 | 19p13.2: 7,804,294 – 7,896,711<br>21q22.12: 36,091,999 – 36,191,098 | EVI5L, FLJ22184, LRRC8E, MAP2K7, SNAPC2, CTXN1<br>No known genes                    |  | 1p21.3        | Loss | 1,092,500  | 97,271,600-98,364,100   | Yes/S  | FLJ35409, DPYD                              |
|    |            |                                                                                        |                                                           |                                                                     |                                                                                     |  | 17p11.1-p11.2 | Gain | 503,100    | 21,634,900-22,138,000   | Yes/NS | FAM27L                                      |
| 27 | SK0136-003 | Simplex family<br>ASD                                                                  | 46,X,der(Y)t(Y;15)(q12;p11.2) pat<br>Paternal inheritance | Not available                                                       |                                                                                     |  | 4p13          | Gain | 42,400     | 44,809,500-44,851,900   | No/NS  | No known genes                              |
|    |            |                                                                                        |                                                           |                                                                     |                                                                                     |  | 8p23.2        | Gain | 234,580    | 2,335,310 - 2,569,890   | No/NS  | No known genes                              |
|    |            |                                                                                        |                                                           |                                                                     |                                                                                     |  | 8q24.23       | Loss | 138,000    | 137,757,000-137,895,000 | No/NS  | No known genes                              |
|    |            |                                                                                        |                                                           |                                                                     |                                                                                     |  | 10p12.1       | Loss | 51,400     | 27,690,500-27,741,900   | No/NS  | PTCHD3                                      |
|    |            |                                                                                        |                                                           |                                                                     |                                                                                     |  | 15q11.2       | Loss | 558,300    | 18,676,700-19,235,000   | No/NS  | LOC283755                                   |
|    |            |                                                                                        |                                                           |                                                                     |                                                                                     |  | 15q26.3       | Gain | 388,100    | 99,827,900-100,216,000  | No/NS  | PCSK6, TARSL2, TM2D3, OR4F6                 |
| 28 | SK0243-003 | Simplex Family<br>ASD                                                                  | 46,XY,del(15)(q23q24.2)<br>de novo                        | See CNV                                                             | See CNV                                                                             |  | 1q21.1        | Loss | 333,539    | 145,700,996-146,034,535 | No/NS  | No known genes                              |
|    |            |                                                                                        |                                                           |                                                                     |                                                                                     |  | 2p22.2        | Gain | 52,951     | 37,847,780              | No/NS  | No known genes                              |

See Tables 2 and 3  
Described previously in Kwasnicka-Crawford et al.<sup>4</sup>

See Table 2  
As noted in the Autism Chromosome Rearrangement Database there are 5 additional reported cases of abnormalities involving 18q; Sibling has a normal 46,XY karyotype also is affected with autism and has oromotor difficulties .

Patient has an unaffected sister with the same karyotype

See Table 2

AJHG, Volume 82

|    |            |                                                           |                                                    |                                           |                |  |                 |      |                         |                         |        |                                         |
|----|------------|-----------------------------------------------------------|----------------------------------------------------|-------------------------------------------|----------------|--|-----------------|------|-------------------------|-------------------------|--------|-----------------------------------------|
|    |            |                                                           |                                                    |                                           |                |  |                 |      | 37,900,740              |                         |        |                                         |
|    |            |                                                           |                                                    |                                           |                |  | 3q27.3          | Gain | 91,422                  | 187,897,578-187,989,000 | No/S   | <i>KNG1, EIF4A2</i>                     |
|    |            |                                                           |                                                    |                                           |                |  | 7p22.3          | Gain | 29,778                  | 141,322-171,100         | No/NS  | No known genes                          |
|    |            |                                                           |                                                    |                                           |                |  | 7p14.1          | Loss | 32,636                  | 38,092,579-38,125,215   | No/NS  | No known genes                          |
|    |            |                                                           |                                                    |                                           |                |  | 10p13           | Loss | 1,570                   | 13,096,593-13,098,163   | No/NS  | No known genes                          |
|    |            |                                                           |                                                    |                                           |                |  | 11p15.1         | Gain | 21,766                  | 18,905,796-18,927,562   | No/NS  | <i>MRGPRX1</i>                          |
|    |            |                                                           |                                                    |                                           |                |  | 15q23-q24.2     | Loss | 4,289,500               | 69,601,300-73,890,800   | Yes/S  | 55 genes                                |
|    |            |                                                           |                                                    |                                           |                |  | 17q12           | Gain | 38,247                  | 31,463,252-31,501,499   | No/NS  | No known genes                          |
|    |            |                                                           |                                                    |                                           |                |  | 17q21.31        | Gain | 83,359                  | 41,636,474-41,719,833   | No/NS  | No known genes                          |
| 29 | SK0245-005 | Simplex Family<br>ASD, epicanthal folds,<br>drooping eyes | 46,XY,trp(15)(q11.2q13)<br>de novo                 | See CNV                                   | See CNV        |  | 6q14.1          | Loss | 47,288                  | 79,036,117-79,083,405   | No/NS  | No known genes                          |
|    |            |                                                           |                                                    |                                           |                |  | 7p14.1          | Loss | 57,861                  | 38,067,354-38,125,215   | No/NS  | No known genes                          |
|    |            |                                                           |                                                    |                                           |                |  | 10p13           | Loss | 2,538                   | 13,095,625-13,098,163   | No/NS  | <i>TARP</i>                             |
|    |            |                                                           |                                                    |                                           |                |  | 11p15.1         | Loss | 12,459                  | 18,905,796-18,918,255   | No/NS  | <i>MRGPRX1</i>                          |
|    |            |                                                           |                                                    |                                           |                |  | 14q11.2         | Loss | 219,458                 | 19,272,965-19,492,423   | No/S   | 6 genes                                 |
|    |            |                                                           |                                                    |                                           |                |  | 14q32.33        | Gain | 27,408                  | 106,223,861-106,251,269 | No/NS  | No known genes                          |
|    |            |                                                           |                                                    |                                           |                |  | 15q11.2-q13.3   | Gain | 11,871,747              | 18,427,100-30,298,847   | Yes/S  | >50 genes                               |
|    |            |                                                           |                                                    |                                           |                |  | 19p13.2         | Loss | 132,251                 | 6,902,567-7,034,818     | No/S   | <i>EMR4, FLG25758, MBD3L2, ZF557</i>    |
| 30 | NA0097-000 | Simplex Family<br>ASD                                     | 46,XX,t(11;12)(q23.3;p13.3)<br>Inheritance unknown | 11q23: not available                      |                |  | 2p25.3-2p15     | Gain | 63,451,406 <sup>p</sup> | 2,994-63,454,400        | Yes/S  | >50 genes                               |
|    |            |                                                           |                                                    |                                           |                |  | 3p24.2          | Loss | 159,273                 | 25,980,400-26,139,673   | No/NS  | No known genes                          |
|    |            |                                                           |                                                    |                                           |                |  | 12p11.21        | Gain | 236,006                 | 31,065,545-31,301,551   | No/S   | <i>DDX11, OVOS2</i>                     |
|    |            |                                                           |                                                    | 12p13.32-p13.31:<br>4,341,718 - 7,918,138 | Multiple genes |  | 14q11.2         | Gain | 489,269                 | 21,498,204-21,987,473   | No/NS  | No known genes                          |
|    |            |                                                           |                                                    |                                           |                |  | Xp22.33-Xp22.31 | Loss | 5,825,311               | 34,419-5,859,730        | Yes/S  | 21 genes                                |
| 31 | SK0300-003 | Multiplex Family<br>ASD, NF1                              | 46,X,inv(Y)(p11.2q11.2)pat<br>Paternal inheritance | Not available                             |                |  | 4p16.1          | Gain | 35,832                  | 7,801,488-7,837,320     | Yes/NS | <i>SORCS2</i>                           |
|    |            |                                                           |                                                    |                                           |                |  | 5p15.33         | Gain | 124,630                 | 752,190-876,820         | No/S   | <i>ZDHC11</i>                           |
|    |            |                                                           |                                                    |                                           |                |  | 6p25.1          | Loss | 215,567                 | 4,200,904-4,416,471     | Yes/S  | No known genes                          |
|    |            |                                                           |                                                    |                                           |                |  | 8q24.23         | Loss | 198,193                 | 137,757,137-137,955,330 | No/S   | No known genes                          |
|    |            |                                                           |                                                    |                                           |                |  | 11p15.4         | Loss | 54,390                  | 6,845,440-6,899,830     | Yes/S  | <i>OR10A2, OR10A4, OR2D2, OR2D3</i>     |
|    |            |                                                           |                                                    |                                           |                |  | 14q11.2         | Loss | 229,676                 | 19,272,965-19,502,641   | No/NS  | 6 genes                                 |
|    |            |                                                           |                                                    |                                           |                |  | 15q11.2         | Loss | 1,908,356               | 18,427,103-20,335,459   | No/S   | <i>LOC283755, POTE15, OR4M2, OR4N4</i>  |
|    |            |                                                           |                                                    |                                           |                |  | 15q21.2         | Gain | 183,903                 | 48,583,127-48,767,030   | Yes/S  | <i>TRPM7, USP50</i>                     |
|    |            |                                                           |                                                    |                                           |                |  | Xp11.23         | Loss | 83,750                  | 47,643,250-47,727,000   | No/S   | <i>ZNF630, SSX6</i>                     |
| 32 | SK0094-005 | Multiplex Family<br>ASD                                   | 46,XX,ins(21;?)(p11.2;?)<br>Inheritance unknown    | Not available                             |                |  | 7q21.2          | Loss | 509,800                 | 90,919,200-91,429,000   | Yes/NS | <i>MTERF, AKAP9, CYP51A1, LOC401387</i> |
|    |            |                                                           |                                                    |                                           |                |  | 9q32            | Gain | 241,000                 | 112,463,000             | No/NS  | <i>KIAA1958, C9orf80</i>                |

See Tables 2 and 3

|  |  |  |  |  |  |          |      |             |                         |        |                |
|--|--|--|--|--|--|----------|------|-------------|-------------------------|--------|----------------|
|  |  |  |  |  |  |          |      | 112,674,000 |                         |        |                |
|  |  |  |  |  |  | 10q11.22 | Gain | 124,800     | 47,030,100-47,154,900   | No/NS  | No known genes |
|  |  |  |  |  |  | 14q32.33 | Gain | 186,000     | 105,829,000-106,015,000 | No/NS  | No known genes |
|  |  |  |  |  |  | Xq23     | Loss | 888,000     | 112,325,000-113,213,000 | Yes/NS | No known genes |

<sup>a</sup>AS/Str indicates if the CNV is Autism Specific (AS) (Yes or No) and if it belongs to the stringent (S) or non-stringent dataset (NS).

<sup>b</sup>63 Mb gain on chromosome 2 is suspected to be a cell line artifact.

<sup>1</sup>Harvard C, Malenfant P, Koochek M, et al. A variant Cri du Chat phenotype and autism spectrum disorder in a subject with de novo cryptic microdeletions involving 5p15.2 and 3p24.3-25 detected using whole genomic array CGH. Clin Genet 2005;67(4): 341-51.

<sup>2</sup>Vincent JB, Horike SI, Choufani S, et al. An inversion inv(4)(p12-p15.3) in autistic siblings implicates the 4p GABA receptor gene cluster. J Med Genet 2006;43(5): 429-34.

<sup>3</sup>Feuk L, Kalervo A, Lipsanen-Nyman M, et al. Absence of a paternally inherited FOXP2 gene in developmental verbal dyspraxia. Am J Hum Genet 2006;79(5): 965-72.

<sup>4</sup>Kwasnicka-Crawford DA, Roberts W, Scherer SW et al. Characterization of an autism-associated segmental maternal heterodisomy of the chromosome 15q11-13 region. J Autism Dev Disord 2007;37(4):694-702.

**Table S3.** Table of All Autism-Specific CNV (NCBI build 35) Displayed in Figure 1

| FamID      | Sex | Type   | Chr | Start       | Stop        | Size      | CNV  | CNV Category                  |
|------------|-----|--------|-----|-------------|-------------|-----------|------|-------------------------------|
| NA0074-000 | M   | SPX    | 1   | 41,463,611  | 41,924,314  | 460,704   | gain | CNVs that are Singletons      |
| SK0036-003 | F   | SPX    | 1   | 57,936,233  | 58,514,629  | 578,396   | gain | CNVs that are Singletons      |
| MM0236-004 | M   | MPX    | 1   | 60,369,200  | 61,426,300  | 1,057,101 | gain | CNVs that are Singletons      |
| MM0020-004 | M   | MPX    | 1   | 65,649,086  | 65,713,423  | 64,338    | gain | CNVs that are Singletons      |
| NA0076-000 | M   | SPX    | 1   | 91,930,266  | 92,330,344  | 400,078   | gain | CNVs that are Singletons      |
| SK0215-006 | M   | CHR    | 1   | 97,271,600  | 98,364,100  | 1,092,500 | loss | CNVs confirmed <i>de novo</i> |
| SK0174-003 | M   | SPX    | 1   | 108,046,000 | 108,246,283 | 200,284   | loss | CNVs that are Singletons      |
| SK0283-003 | F   | CHR    | 1   | 148,095,537 | 149,547,463 | 1,451,926 | gain | CNVs that are Singletons      |
| MM0011-003 | M   | MPX    | 1   | 165,908,677 | 166,028,402 | 119,726   | loss | CNVs that are Singletons      |
| SK0132-003 | M   | MPX    | 1   | 186,673,899 | 186,716,570 | 42,672    | loss | CNVs that are Singletons      |
| SK0278-003 | M   | SPX    | 1   | 188,543,244 | 188,935,335 | 392,092   | gain | CNVs that overlap the ACRD    |
| MM0149-003 | M   | MPX    | 1   | 191,030,551 | 191,223,110 | 192,560   | gain | CNVs that overlap the ACRD    |
| NA0109-000 | M   | SPX    | 1   | 212,037,558 | 212,471,000 | 433,443   | loss | CNVs that are Singletons      |
| SK0183-004 | M   | SPX    | 1   | 238,633,145 | 239,606,926 | 973,781   | loss | CNVs that are Singletons      |
| SK0229-003 | M   | SPX    | 1   | 242,451,000 | 243,113,489 | 662,489   | gain | CNVs that overlap the ACRD    |
| NA0016-000 | F   | SPX    | 1   | 243,172,012 | 243,301,056 | 129,044   | gain | CNVs that overlap the ACRD    |
| MM0219-003 | M   | MPX    | 2   | 34,155,700  | 34,253,221  | 97,522    | loss | CNVs that are Singletons      |
| MM0295-003 | M   | MPX    | 2   | 34,662,196  | 34,780,515  | 118,320   | loss | CNVs that are Singletons      |
| NA0083-000 | M   | SPX    | 2   | 34,858,330  | 34,937,455  | 79,125    | loss | CNVs that are Singletons      |
| SK0270-003 | M   | SPX    | 2   | 39,992,374  | 40,053,300  | 60,926    | loss | CNVs that are Singletons      |
| NA0055-000 | M   | SPX    | 2   | 41,958,200  | 42,088,448  | 130,249   | loss | CNVs that are Singletons      |
| MM0063-003 | F   | MPX    | 2   | 50,780,202  | 50,859,200  | 78,999    | loss | CNVs that overlap the ACRD    |
| SK0301-003 | M   | MPX    | 2   | 52,856,046  | 52,969,575  | 113,530   | loss | CNVs that are Singletons      |
| SK0234-003 | M   | MPX    | 2   | 54,171,783  | 54,345,700  | 173,917   | gain | CNVs that overlap the ACRD    |
| SK0188-003 | M   | SPX    | 2   | 112,415,581 | 112,510,212 | 94,632    | loss | CNVs that overlap the ACRD    |
| SK0147-003 | F   | SPX    | 2   | 114,855,796 | 115,334,166 | 478,371   | loss | CNVs Recurrent/Overlapping    |
| SK0288-003 | F   | SPX-MZ | 2   | 115,141,880 | 115,247,000 | 105,121   | gain | CNVs Recurrent/Overlapping    |
| NA0027-000 | M   | MPX    | 2   | 121,623,000 | 121,684,915 | 61,915    | loss | CNVs that are Singletons      |
| NA0057-000 | M   | SPX    | 2   | 125,496,832 | 125,890,571 | 393,740   | loss | CNVs that are Singletons      |
| MM0176-003 | M   | MPX    | 2   | 135,358,000 | 135,471,070 | 113,071   | loss | CNVs that are Singletons      |
| SK0225-003 | M   | SPX    | 2   | 155,849,451 | 155,988,560 | 139,109   | loss | CNVs that are Singletons      |
| SK0192-003 | M   | SPX    | 2   | 181,771,621 | 181,944,065 | 172,445   | loss | CNVs that are Singletons      |
| NA0030-000 | M   | SPX    | 2   | 186,674,000 | 186,786,323 | 112,324   | loss | CNVs Recurrent/Overlapping    |

AJHG, Volume 82

|            |   |     |   |             |             |           |      |                                                          |
|------------|---|-----|---|-------------|-------------|-----------|------|----------------------------------------------------------|
| SK0306-004 | F | SPX | 2 | 186,674,000 | 186,771,130 | 97,131    | loss | CNVs Recurrent/Overlapping/CNVs confirmed <i>de novo</i> |
| NA0007-000 | M | SPX | 2 | 195,170,000 | 195,217,247 | 47,248    | gain | CNVs that are Singletons                                 |
| MM0019-003 | M | MPX | 2 | 201,286,000 | 201,317,066 | 31,067    | loss | CNVs that overlap the ACRD                               |
| MM0296-003 | M | MPX | 2 | 221,429,610 | 221,551,000 | 121,391   | loss | CNVs that overlap the ACRD                               |
| NA0004-000 | M | SPX | 2 | 235,797,267 | 236,239,000 | 441,734   | gain | CNVs that overlap the ACRD                               |
| MM0068-003 | M | MPX | 3 | 1,720,948   | 1,795,234   | 74,287    | gain | CNVs that overlap the ACRD                               |
| SK0283-003 | F | CHR | 3 | 5,365,506   | 5,409,964   | 44,458    | loss | CNVs that are Singletons                                 |
| MM0210-004 | M | MPX | 3 | 7,957,390   | 8,250,541   | 293,151   | gain | CNVs that are Singletons                                 |
| SK0152-003 | M | CHR | 3 | 15,125,800  | 16,535,400  | 1,409,600 | loss | CNVs confirmed <i>de novo</i>                            |
| NA0044-000 | M | SPX | 3 | 35,613,300  | 35,928,200  | 314,901   | gain | CNVs that are Singletons                                 |
| SK0021-008 | M | MPX | 3 | 36,110,965  | 36,215,909  | 104,945   | loss | CNVs that are Singletons                                 |
| MM0154-003 | F | MPX | 3 | 50,089,500  | 50,199,200  | 109,701   | gain | CNVs that are Singletons                                 |
| NA0067-000 | M | SPX | 3 | 61,075,295  | 61,581,100  | 505,806   | gain | CNVs that overlap the ACRD                               |
| SK0181-003 | M | CHR | 3 | 65,286,300  | 70,633,200  | 5,346,900 | loss | CNVs confirmed <i>de novo</i>                            |
| SK0152-003 | M | CHR | 3 | 78,902,000  | 78,957,000  | 55,000    | gain | CNVs that are Singletons                                 |
| NA0044-000 | M | SPX | 3 | 82,866,400  | 84,544,763  | 1,678,364 | gain | CNVs that are Singletons                                 |
| SK0023-003 | M | SPX | 3 | 99,400,957  | 99,484,400  | 83,443    | gain | CNVs that are Singletons                                 |
| NA0018-000 | M | SPX | 3 | 117,838,700 | 117,937,000 | 98,301    | gain | CNVs that are Singletons                                 |
| NA0003-000 | M | SPX | 3 | 124,386,373 | 124,456,000 | 69,628    | gain | CNVs that are Singletons                                 |
| NA0090-000 | M | SPX | 3 | 183,837,706 | 183,940,069 | 102,364   | gain | CNVs that are Singletons                                 |
| MM0296-003 | M | MPX | 4 | 328,851     | 542,862     | 214,012   | gain | CNVs that overlap the ACRD                               |
| MM0228-004 | M | MPX | 4 | 11,820,924  | 11,983,053  | 162,130   | loss | CNVs that overlap the ACRD                               |
| NA0129-000 | M | SPX | 4 | 38,109,899  | 38,349,444  | 239,546   | gain | CNVs that overlap the ACRD                               |
| SK0283-003 | F | CHR | 4 | 44,762,996  | 44,858,504  | 95,508    | gain | CNVs that overlap the ACRD                               |
| MM0010-005 | M | MPX | 4 | 44,773,367  | 44,846,800  | 73,434    | gain | CNVs that overlap the ACRD                               |
| NA0093-000 | M | SPX | 4 | 44,773,367  | 44,846,800  | 73,433    | gain | CNVs that overlap the ACRD                               |
| NA0044-000 | M | SPX | 4 | 55,718,164  | 55,811,710  | 93,547    | loss | CNVs that are Singletons                                 |
| SK0188-003 | M | SPX | 4 | 61,408,094  | 61,758,800  | 350,707   | loss | CNVs that overlap the ACRD                               |
| SK0057-003 | M | SPX | 4 | 74,105,700  | 74,464,300  | 358,600   | gain | CNVs that overlap the ACRD                               |
| MM0176-003 | M | MPX | 4 | 91,220,121  | 91,309,602  | 89,482    | loss | CNVs that overlap the ACRD                               |
| NA0016-000 | F | SPX | 4 | 114,333,509 | 114,416,051 | 82,542    | loss | CNVs that are Singletons                                 |
| SK0012-003 | M | SPX | 4 | 152,993,000 | 153,381,007 | 388,008   | gain | CNVs that are Singletons                                 |
| SK0103-005 | M | SPX | 4 | 157,615,000 | 157,683,000 | 68,000    | gain | CNVs that are Singletons                                 |
| SK0012-003 | M | SPX | 4 | 162,387,402 | 163,362,655 | 975,254   | gain | CNVs that overlap the ACRD                               |
| SK0012-003 | M | SPX | 4 | 173,324,616 | 174,954,056 | 1,629,441 | gain | CNVs that overlap the ACRD                               |

AJHG, Volume 82

|            |   |     |   |             |             |            |      |                               |
|------------|---|-----|---|-------------|-------------|------------|------|-------------------------------|
| NA0037-000 | M | SPX | 4 | 179,692,000 | 179,865,679 | 173,680    | gain | CNVs that are Singletons      |
| MM0299-003 | F | MPX | 4 | 181,968,784 | 182,095,665 | 126,882    | loss | CNVs that are Singletons      |
| SK0266-003 | M | SPX | 4 | 183,466,000 | 183,517,000 | 51,000     | loss | CNVs that are Singletons      |
| SK0166-003 | M | SPX | 4 | 186,788,000 | 187,118,000 | 330,001    | gain | CNVs that overlap the ACRD    |
| SK0074-003 | M | MPX | 4 | 188,230,567 | 190,154,000 | 1,923,434  | gain | CNVs that overlap the ACRD    |
| SK0083-003 | M | CHR | 4 | 188,232,000 | 188,253,314 | 21,315     | gain | CNVs that overlap the ACRD    |
| MM0109-003 | F | SPX | 4 | 189,538,747 | 189,825,000 | 286,254    | gain | CNVs that overlap the ACRD    |
| SK0112-003 | M | MPX | 4 | 189,580,553 | 190,228,000 | 647,447    | gain | CNVs that overlap the ACRD    |
| MM0019-003 | M | MPX | 4 | 190,172,765 | 191,306,043 | 1,133,279  | gain | CNVs that overlap the ACRD    |
| SK0205-004 | F | CHR | 5 | 81,949      | 13,882,933  | 13,800,984 | loss | CNVs confirmed <i>de novo</i> |
| SK0152-003 | M | CHR | 5 | 9,275,811   | 12,705,200  | 3,429,389  | loss | CNVs confirmed <i>de novo</i> |
| SK0188-003 | M | SPX | 5 | 13,832,700  | 14,237,600  | 404,901    | gain | CNVs that overlap the ACRD    |
| SK0002-003 | F | CHR | 5 | 14,940,400  | 15,179,500  | 239,100    | gain | CNVs that are Singletons      |
| NA0078-000 | M | MPX | 5 | 25,125,371  | 25,450,672  | 325,302    | gain | CNVs that are Singletons      |
| NA0076-000 | M | SPX | 5 | 37,409,881  | 37,778,834  | 368,953    | gain | CNVs that are Singletons      |
| SK0335-003 | F | CHR | 5 | 38,534,384  | 38,807,002  | 272,619    | loss | CNVs that are Singletons      |
| NA0078-000 | M | MPX | 5 | 79,336,190  | 79,613,516  | 277,327    | loss | CNVs that overlap the ACRD    |
| NA0145-000 | M | SPX | 5 | 89,445,869  | 90,172,900  | 727,032    | gain | CNVs that overlap the ACRD    |
| MM0143-004 | M | MPX | 5 | 110,440,484 | 110,471,180 | 30,697     | gain | CNVs that are Singletons      |
| NA0023-000 | F | SPX | 5 | 113,104,916 | 113,178,000 | 73,084     | loss | CNVs that are Singletons      |
| SK0167-003 | F | MPX | 5 | 120,343,925 | 120,474,000 | 130,076    | gain | CNVs that overlap the ACRD    |
| NA0019-000 | M | SPX | 5 | 120,964,000 | 121,095,213 | 131,214    | gain | CNVs that overlap the ACRD    |
| SK0118-003 | M | SPX | 5 | 122,834,399 | 123,029,036 | 194,638    | loss | CNVs that are Singletons      |
| SK0077-003 | M | SPX | 5 | 128,968,799 | 129,433,000 | 464,201    | gain | CNVs that are Singletons      |
| MM0215-004 | M | MPX | 5 | 132,619,430 | 132,732,003 | 112,574    | loss | CNVs that overlap the ACRD    |
| SK0073-003 | F | CHR | 5 | 134,426,000 | 134,519,000 | 93,000     | gain | CNVs that overlap the ACRD    |
| SK0300-003 | M | CHR | 6 | 4,200,904   | 4,416,471   | 215,568    | loss | CNVs that are Singletons      |
| MM0212-004 | F | MPX | 6 | 17,505,095  | 17,703,208  | 198,114    | gain | CNVs that are Singletons      |
| MM0300-003 | F | MPX | 6 | 27,827,354  | 28,119,631  | 292,278    | gain | CNVs that are Singletons      |
| MM0225-004 | M | MPX | 6 | 69,929,900  | 70,278,043  | 348,144    | gain | CNVs that are Singletons      |
| SK0272-003 | F | SPX | 6 | 77,622,920  | 77,673,932  | 51,012     | loss | CNVs that overlap the ACRD    |
| MM0225-004 | M | MPX | 6 | 93,087,482  | 98,011,900  | 4,924,419  | gain | CNVs that overlap the ACRD    |
| SK0077-003 | M | SPX | 6 | 95,461,800  | 95,581,304  | 119,504    | loss | CNVs that overlap the ACRD    |
| SK0087-003 | M | MPX | 6 | 97,566,274  | 97,658,527  | 92,253     | loss | CNVs that overlap the ACRD    |
| SK0217-003 | M | SPX | 6 | 112,679,982 | 112,776,094 | 96,112     | gain | CNVs that are Singletons      |



AJHG, Volume 82

|            |   |     |   |             |             |            |      |                                                          |
|------------|---|-----|---|-------------|-------------|------------|------|----------------------------------------------------------|
| MM0220-003 | M | MPX | 6 | 118,799,000 | 119,117,000 | 318,001    | gain | CNVs Recurrent/Overlapping                               |
| NA0025-000 | M | SPX | 6 | 118,823,011 | 119,117,000 | 293,990    | gain | CNVs Recurrent/Overlapping                               |
| SK0326-003 | M | SPX | 6 | 137,930,847 | 138,011,644 | 80,798     | gain | CNVs that are Singletons                                 |
| SK0216-003 | M | SPX | 6 | 153,519,631 | 153,791,029 | 271,398    | gain | CNVs that overlap the ACRD                               |
| MM0088-003 | F | MPX | 7 | 2,922,139   | 2,964,895   | 42,757     | loss | CNVs that are Singletons                                 |
| NA0147-000 | M | SPX | 7 | 3,946,854   | 4,002,686   | 55,833     | loss | CNVs that are Singletons                                 |
| SK0049-004 | M | MPX | 7 | 11,526,500  | 11,560,300  | 33,800     | gain | CNVs that are Singletons                                 |
| SK0132-003 | M | MPX | 7 | 20,242,925  | 20,345,800  | 102,876    | gain | CNVs that are Singletons                                 |
| NA0145-000 | M | SPX | 7 | 47,742,927  | 48,775,200  | 1,032,274  | loss | CNVs that are Singletons                                 |
| SK0083-003 | M | CHR | 7 | 108,200,381 | 119,223,887 | 11,023,507 | loss | CNVs confirmed <i>de novo</i>                            |
| NA0061-000 | M | SPX | 7 | 108,357,049 | 108,597,525 | 240,477    | loss | CNVs that overlap the ACRD                               |
| SK0131-003 | F | CHR | 7 | 113,335,000 | 128,821,721 | 15,486,722 | loss | CNVs confirmed <i>de novo</i>                            |
| SK0226-005 | M | SPX | 7 | 118,462,717 | 118,679,189 | 216,473    | loss | CNVs that overlap the ACRD                               |
| SK0190-003 | M | SPX | 7 | 152,698,000 | 154,478,000 | 1,780,000  | gain | CNVs Recurrent/Overlapping                               |
| SK0115-003 | M | SPX | 7 | 153,098,000 | 153,372,000 | 274,001    | gain | CNVs Recurrent/Overlapping                               |
| SK0058-003 | M | MPX | 7 | 153,539,745 | 153,556,533 | 16,789     | gain | CNVs Recurrent/Overlapping                               |
| NA0002-000 | M | SPX | 7 | 153,585,000 | 153,651,462 | 66,463     | loss | CNVs Recurrent/Overlapping/CNVs confirmed <i>de novo</i> |
| SK0262-003 | M | SPX | 8 | 710,491     | 1,501,580   | 791,089    | gain | CNVs confirmed <i>de novo</i>                            |
| SK0119-003 | M | MPX | 8 | 17,706,313  | 17,738,524  | 32,211     | loss | CNVs that are Singletons                                 |
| SK0262-003 | M | SPX | 8 | 18,623,000  | 19,442,500  | 819,500    | gain | CNVs that are Singletons                                 |
| SK0077-003 | M | SPX | 8 | 42,971,601  | 43,820,300  | 848,699    | gain | CNVs that are Singletons                                 |
| SK0143-003 | M | SPX | 8 | 53,481,200  | 53,766,400  | 285,201    | gain | CNVs Recurrent/Overlapping                               |
| MM0236-004 | M | MPX | 8 | 53,724,445  | 53,996,124  | 271,680    | gain | CNVs Recurrent/Overlapping                               |
| SK0294-003 | M | SPX | 8 | 73,762,894  | 73,798,241  | 35,348     | gain | CNVs that are Singletons                                 |
| SK0076-003 | F | SPX | 8 | 83,989,256  | 84,141,278  | 152,022    | gain | CNVs that are Singletons                                 |
| MM0241-004 | M | MPX | 8 | 87,230,811  | 87,498,988  | 268,178    | gain | CNVs that are Singletons                                 |
| MM0218-004 | M | MPX | 8 | 89,598,961  | 89,678,800  | 79,840     | loss | CNVs that overlap the ACRD                               |
| MM0210-004 | M | MPX | 8 | 104,166,572 | 104,947,190 | 780,618    | gain | CNVs that are Singletons                                 |
| SK0194-003 | M | SPX | 8 | 123,539,127 | 123,644,422 | 105,296    | loss | CNVs that are Singletons                                 |
| SK0292-003 | F | MPX | 8 | 130,467,000 | 130,529,193 | 62,194     | loss | CNVs that are Singletons                                 |
| MM0007-003 | M | MPX | 9 | 5,099,530   | 5,235,490   | 135,961    | gain | CNVs that are Singletons                                 |
| SK0270-003 | M | SPX | 9 | 7,725,280   | 7,764,180   | 38,900     | loss | CNVs Recurrent/Overlapping                               |
| MM0103-003 | M | MPX | 9 | 7,725,283   | 7,760,233   | 34,951     | loss | CNVs Recurrent/Overlapping                               |
| MM0711-003 | M | MPX | 9 | 16,092,066  | 16,379,100  | 287,035    | gain | CNVs that are Singletons                                 |
| SK0015-003 | M | MPX | 9 | 19,284,100  | 19,511,500  | 227,400    | gain | CNVs that are Singletons                                 |

**AJHG, Volume 82**

|            |   |     |    |             |             |           |      |                            |
|------------|---|-----|----|-------------|-------------|-----------|------|----------------------------|
| SK0015-003 | M | MPX | 9  | 19,702,200  | 24,674,100  | 4,971,900 | loss | CNVs that are Singletons   |
| SK0278-003 | M | SPX | 9  | 22,626,541  | 22,747,714  | 121,174   | loss | CNVs that are Singletons   |
| SK0148-005 | F | SPX | 9  | 24,607,036  | 24,682,114  | 75,078    | loss | CNVs that are Singletons   |
| MM0020-004 | M | MPX | 9  | 25,439,100  | 25,535,000  | 95,901    | loss | CNVs that are Singletons   |
| SK0210-004 | M | MPX | 9  | 28,577,800  | 29,218,800  | 641,000   | loss | CNVs that overlap the ACRD |
| NA0105-000 | M | SPX | 9  | 33,054,336  | 33,294,800  | 240,465   | gain | CNVs that are Singletons   |
| SK0273-003 | M | MPX | 9  | 70,739,231  | 70,870,084  | 130,854   | loss | CNVs that overlap the ACRD |
| NA0147-000 | M | SPX | 9  | 84,957,060  | 85,054,672  | 97,613    | loss | CNVs that are Singletons   |
| SK0045-003 | M | MPX | 9  | 109,446,000 | 109,837,000 | 391,000   | gain | CNVs that are Singletons   |
| SK0118-003 | M | SPX | 9  | 111,652,000 | 112,212,452 | 560,453   | gain | CNVs that overlap the ACRD |
| NA0066-000 | M | SPX | 9  | 116,528,784 | 116,612,329 | 83,546    | loss | CNVs that overlap the ACRD |
| MM0117-003 | M | MPX | 10 | 2,313,505   | 2,407,102   | 93,598    | loss | CNVs that are Singletons   |
| MM0225-004 | M | MPX | 10 | 4,976,040   | 5,124,511   | 148,472   | gain | CNVs that are Singletons   |
| MM1086-004 | M | MPX | 10 | 31,256,118  | 31,604,509  | 348,392   | loss | CNVs that are Singletons   |
| SK0102-004 | M | SPX | 10 | 42,611,900  | 43,266,300  | 654,400   | gain | CNVs that overlap the ACRD |
| SK0102-004 | M | SPX | 10 | 44,988,900  | 45,468,800  | 479,900   | gain | CNVs that overlap the ACRD |
| MM0068-003 | M | MPX | 10 | 68,139,200  | 68,246,027  | 106,828   | loss | CNVs that are Singletons   |
| NA0037-000 | M | SPX | 10 | 104,641,000 | 104,786,777 | 145,778   | loss | CNVs that are Singletons   |
| NA0109-000 | M | SPX | 10 | 112,267,330 | 112,405,408 | 138,079   | gain | CNVs that overlap the ACRD |
| SK0131-003 | F | CHR | 10 | 128,501,014 | 128,592,091 | 91,078    | gain | CNVs that overlap the ACRD |
| NA0138-000 | M | SPX | 10 | 133,285,000 | 133,604,999 | 320,000   | gain | CNVs that overlap the ACRD |
| SK0300-003 | M | CHR | 11 | 6,845,440   | 6,899,830   | 54,391    | loss | CNVs that are Singletons   |
| NA0113-000 | M | SPX | 11 | 9,984,119   | 10,667,800  | 683,682   | loss | CNVs that overlap the ACRD |
| SK0322-003 | M | SPX | 11 | 33,159,190  | 33,462,070  | 302,881   | gain | CNVs that are Singletons   |
| MM0272-003 | M | MPX | 11 | 40,285,800  | 40,548,738  | 262,939   | loss | CNVs Recurrent/Overlapping |
| SK0167-003 | F | MPX | 11 | 40,417,554  | 40,610,400  | 192,847   | loss | CNVs Recurrent/Overlapping |
| MM0305-003 | M | MPX | 11 | 68,053,777  | 68,204,900  | 151,123   | gain | CNVs that are Singletons   |
| NA0032-000 | M | SPX | 11 | 76,114,600  | 76,140,500  | 25,900    | gain | CNVs that are Singletons   |
| MM0212-004 | F | MPX | 11 | 99,148,202  | 99,289,243  | 141,042   | loss | CNVs that are Singletons   |
| SK0167-003 | F | MPX | 11 | 101,131,785 | 101,246,901 | 115,117   | loss | CNVs that are Singletons   |
| MM0112-005 | M | MPX | 11 | 116,789,980 | 116,855,347 | 65,368    | gain | CNVs that are Singletons   |
| MM0240-003 | F | MPX | 11 | 117,452,000 | 117,539,000 | 87,001    | gain | CNVs that are Singletons   |
| SK0255-003 | M | SPX | 11 | 124,303,460 | 124,719,976 | 416,517   | gain | CNVs that are Singletons   |
| NA0065-000 | M | SPX | 11 | 125,639,908 | 126,102,027 | 462,120   | gain | CNVs that are Singletons   |
| SK0218-003 | F | CHR | 12 | 1,760,084   | 1,852,412   | 92,328    | loss | CNVs that overlap the ACRD |

AJHG, Volume 82

|            |   |     |    |             |             |            |      |                                                          |
|------------|---|-----|----|-------------|-------------|------------|------|----------------------------------------------------------|
| NA0172-000 | M | SPX | 12 | 3,727,911   | 3,879,230   | 151,320    | loss | CNVs that are Singletons                                 |
| SK0059-003 | M | SPX | 12 | 10,431,082  | 10,445,300  | 14,218     | gain | CNVs that are Singletons                                 |
| SK0152-003 | M | CHR | 12 | 40,584,198  | 41,007,040  | 422,842    | loss | CNVs confirmed <i>de novo</i>                            |
| SK0326-003 | M | SPX | 12 | 46,170,200  | 46,365,774  | 195,575    | gain | CNVs that are Singletons                                 |
| SK0110-003 | M | SPX | 12 | 50,520,400  | 50,573,516  | 53,116     | gain | CNVs that are Singletons                                 |
| NA0071-000 | F | SPX | 12 | 57,408,270  | 58,532,356  | 1,124,087  | gain | CNVs that are Singletons                                 |
| SK0305-003 | F | SPX | 12 | 77,239,265  | 77,364,400  | 125,136    | loss | CNVs that are Singletons                                 |
| SK0301-003 | M | MPX | 12 | 83,388,935  | 83,428,800  | 39,866     | gain | CNVs that are Singletons                                 |
| NA0093-000 | M | SPX | 12 | 96,496,784  | 96,568,500  | 71,716     | loss | CNVs that are Singletons                                 |
| MM0711-003 | M | MPX | 12 | 96,576,486  | 96,639,686  | 63,201     | loss | CNVs that are Singletons                                 |
| SK0292-003 | F | MPX | 12 | 101,568,000 | 101,586,000 | 18,001     | gain | CNVs that are Singletons                                 |
| NA0109-000 | M | SPX | 12 | 110,646,607 | 110,800,000 | 153,394    | gain | CNVs that are Singletons                                 |
| MM0278-003 | M | SPX | 12 | 114,170,000 | 132,388,000 | 18,218,001 | gain | CNVs confirmed <i>de novo</i>                            |
| MM0210-004 | M | MPX | 12 | 125,446,000 | 125,757,000 | 311,000    | gain | CNVs that are Singletons                                 |
| SK0079-003 | M | MPX | 13 | 17,960,300  | 18,492,994  | 532,694    | gain | CNVs that are Singletons                                 |
| NA0122-000 | F | SPX | 13 | 32,965,700  | 33,137,655  | 171,956    | gain | CNVs that overlap the ACRD                               |
| NA0117-000 | M | SPX | 13 | 42,511,458  | 42,599,200  | 87,743     | gain | CNVs that overlap the ACRD                               |
| MM0154-003 | F | MPX | 13 | 54,651,953  | 55,025,229  | 373,277    | gain | CNVs that overlap the ACRD                               |
| NA0028-000 | M | SPX | 13 | 62,915,912  | 62,977,748  | 61,837     | loss | CNVs that are Singletons                                 |
| SK0023-003 | M | SPX | 13 | 66,470,851  | 66,660,289  | 189,438    | gain | CNVs Recurrent/Overlapping                               |
| MM0299-003 | F | MPX | 13 | 66,487,899  | 66,660,300  | 172,402    | gain | CNVs Recurrent/Overlapping                               |
| SK0326-003 | M | SPX | 13 | 89,726,966  | 90,134,219  | 407,254    | gain | CNVs that are Singletons                                 |
| NA0048-000 | M | SPX | 13 | 93,288,520  | 93,344,600  | 56,081     | gain | CNVs that are Singletons                                 |
| SK0326-003 | M | SPX | 13 | 93,497,400  | 93,732,931  | 235,532    | gain | CNVs that are Singletons                                 |
| SK0328-003 | M | SPX | 13 | 103,896,769 | 103,930,492 | 33,724     | loss | CNVs that overlap the ACRD                               |
| SK0254-003 | M | SPX | 13 | 105,172,000 | 105,357,000 | 185,000    | gain | CNVs that are Singletons                                 |
| MM0295-003 | M | MPX | 13 | 113,361,712 | 113,646,000 | 284,289    | gain | CNVs that overlap the ACRD                               |
| SK0305-004 | F | SPX | 14 | 42,022,286  | 42,210,026  | 187,741    | loss | CNVs that overlap the ACRD                               |
| SK0320-003 | M | MPX | 14 | 45,537,581  | 45,653,418  | 115,838    | loss | CNVs that overlap the ACRD                               |
| SK0121-003 | M | SPX | 14 | 76,007,842  | 76,924,400  | 916,558    | gain | CNVs that are Singletons                                 |
| MM0225-004 | M | MPX | 14 | 83,373,278  | 83,435,200  | 61,923     | gain | CNVs that overlap the ACRD                               |
| SK0031-003 | M | CHR | 14 | 99,015,100  | 99,787,500  | 772,400    | gain | CNVs that are Singletons                                 |
| MM0154-003 | F | MPX | 14 | 106,223,861 | 106,356,482 | 132,622    | gain | CNVs that overlap the ACRD                               |
| SK0073-003 | F | CHR | 15 | 18,376,200  | 30,298,800  | 11,922,600 | gain | CNVs Recurrent/Overlapping/CNVs confirmed <i>de novo</i> |
| SK0245-005 | M | CHR | 15 | 18,427,100  | 30,298,847  | 11,871,747 | gain | CNVs Recurrent/Overlapping/CNVs confirmed <i>de novo</i> |

AJHG, Volume 82

|            |   |     |    |            |            |            |      |                                                          |
|------------|---|-----|----|------------|------------|------------|------|----------------------------------------------------------|
| SK0300-003 | M | CHR | 15 | 48,583,127 | 48,767,030 | 183,904    | gain | CNVs that are Singletons                                 |
| SK0243-003 | M | CHR | 15 | 69,601,300 | 73,890,800 | 4,289,500  | loss | CNVs confirmed <i>de novo</i>                            |
| NA0064-000 | M | SPX | 15 | 82,573,421 | 83,631,697 | 1,058,276  | loss | CNVs that overlap the ACRD                               |
| MM0256-004 | M | MPX | 15 | 87,922,400 | 87,993,909 | 71,510     | gain | CNVs that overlap the ACRD                               |
| SK0326-003 | M | SPX | 15 | 97,406,000 | 97,961,522 | 555,523    | gain | CNVs that are Singletons                                 |
| SK0266-003 | M | SPX | 16 | 6,813,789  | 6,898,849  | 85,060     | loss | CNVs that overlap the ACRD                               |
| MM0109-003 | F | SPX | 16 | 21,441,805 | 22,688,093 | 1,246,289  | gain | CNVs Recurrent/Overlapping                               |
| MM0289-003 | F | MPX | 16 | 21,808,808 | 22,611,363 | 802,556    | loss | CNVs Recurrent/Overlapping                               |
| MM0088-003 | F | MPX | 16 | 29,559,989 | 30,235,818 | 675,830    | loss | CNVs Recurrent/Overlapping/CNVs confirmed <i>de novo</i> |
| SK0019-004 | M | SPX | 16 | 29,559,989 | 30,235,818 | 675,830    | loss | CNVs Recurrent/Overlapping/CNVs confirmed <i>de novo</i> |
| NA0133-000 | F | SPX | 16 | 29,559,989 | 30,085,308 | 525,320    | gain | CNVs Recurrent/Overlapping/CNVs confirmed <i>de novo</i> |
| SK0281-003 | M | SPX | 16 | 57,542,779 | 57,579,900 | 37,122     | loss | CNVs that are Singletons                                 |
| NA0063-000 | M | SPX | 16 | 73,397,667 | 73,657,067 | 259,400    | loss | CNVs that overlap the ACRD                               |
| NA0095-000 | M | SPX | 16 | 74,576,356 | 74,613,000 | 36,645     | loss | CNVs that overlap the ACRD                               |
| MM0310-005 | M | MPX | 16 | 80,972,252 | 80,983,135 | 10,884     | loss | CNVs that are Singletons                                 |
| SK0203-004 | M | MPX | 16 | 82,603,600 | 82,687,900 | 84,300     | gain | CNVs that are Singletons                                 |
| NA0067-000 | M | SPX | 16 | 87,800,593 | 88,066,260 | 265,668    | loss | CNVs confirmed <i>de novo</i>                            |
| SK0085-004 | M | MPX | 17 | 3,836,592  | 3,998,867  | 162,276    | gain | CNVs that are Singletons                                 |
| SK0284-003 | F | SPX | 17 | 28,985,300 | 29,960,700 | 975,400    | gain | CNVs that overlap the ACRD                               |
| MM0109-003 | F | SPX | 17 | 40,555,289 | 41,089,766 | 534,478    | loss | CNVs that are Singletons                                 |
| MM0240-003 | F | MPX | 17 | 40,555,289 | 41,128,323 | 573,035    | loss | CNVs that are Singletons                                 |
| SK0298-003 | M | SPX | 17 | 76,914,079 | 77,771,141 | 857,063    | gain | CNVs that are Singletons                                 |
| SK0328-003 | M | SPX | 18 | 13,794,043 | 14,743,900 | 949,858    | gain | CNVs that are Singletons                                 |
| SK0012-003 | M | SPX | 18 | 27,565,032 | 27,781,900 | 216,869    | gain | CNVs that overlap the ACRD                               |
| SK0303-003 | F | MPX | 18 | 28,383,551 | 28,448,100 | 64,550     | loss | CNVs that are Singletons                                 |
| SK0152-003 | M | CHR | 18 | 32,174,061 | 32,990,975 | 816,914    | loss | CNVs that overlap the ACRD                               |
| SK0147-003 | F | SPX | 18 | 37,509,556 | 37,950,450 | 440,895    | gain | CNVs that overlap the ACRD                               |
| SK0304-003 | M | SPX | 18 | 46,101,841 | 46,218,000 | 116,160    | gain | CNVs that overlap the ACRD                               |
| SK0014-003 | M | SPX | 18 | 52,531,252 | 53,165,421 | 634,169    | gain | CNVs that are Singletons                                 |
| SK0218-003 | F | CHR | 18 | 55,756,601 | 76,115,600 | 20,358,999 | loss | CNVs confirmed <i>de novo</i>                            |
| NA0138-000 | M | SPX | 18 | 69,282,461 | 69,330,584 | 48,124     | loss | CNVs that overlap the ACRD                               |
| SK0121-003 | M | SPX | 19 | 33,693,363 | 33,762,805 | 69,442     | loss | CNVs that are Singletons                                 |
| NA0111-000 | M | SPX | 19 | 57,836,600 | 58,246,200 | 409,601    | gain | CNVs that are Singletons                                 |
| NA0004-000 | M | SPX | 19 | 58,634,965 | 58,958,584 | 323,620    | gain | CNVs that are Singletons                                 |
| NA0070-000 | F | SPX | 19 | 60,499,398 | 60,742,656 | 243,259    | loss | CNVs that are Singletons                                 |

**AJHG, Volume 82**

|            |   |        |    |             |             |           |      |                                                          |
|------------|---|--------|----|-------------|-------------|-----------|------|----------------------------------------------------------|
| SK0047-003 | F | SPX    | 19 | 61,910,800  | 62,644,900  | 734,100   | loss | CNVs that are Singletons                                 |
| NA0110-000 | M | SPX    | 19 | 63,050,356  | 63,193,800  | 143,445   | loss | CNVs that are Singletons                                 |
| SK0232-003 | M | MPX    | 19 | 63,483,000  | 63,771,100  | 288,100   | gain | CNVs that are Singletons                                 |
| MM0018-003 | M | MPX    | 20 | 11,319,093  | 11,424,900  | 105,808   | loss | CNVs that are Singletons                                 |
| SK0335-003 | F | CHR    | 20 | 14,955,730  | 15,011,214  | 55,485    | loss | CNVs that are Singletons                                 |
| SK0258-004 | M | SPX    | 20 | 45,468,000  | 45,673,300  | 205,300   | gain | CNVs that are Singletons                                 |
| MM0109-003 | F | SPX    | 20 | 60,949,339  | 62,377,000  | 1,427,662 | gain | CNVs confirmed <i>de novo</i>                            |
| MM0126-003 | M | MPX    | 21 | 22,839,570  | 22,938,377  | 98,808    | loss | CNVs that are Singletons                                 |
| SK0118-003 | M | SPX    | 21 | 28,060,406  | 28,250,400  | 189,995   | loss | CNVs that are Singletons                                 |
| SK0244-003 | M | SPX    | 21 | 42,974,148  | 43,328,084  | 353,936   | gain | CNVs confirmed <i>de novo</i>                            |
| SK0023-003 | M | SPX    | 21 | 46,497,675  | 46,678,820  | 181,145   | gain | CNVs that overlap the ACRD                               |
| SK0119-003 | M | MPX    | 22 | 17,014,900  | 19,786,200  | 2,771,300 | loss | CNVs Recurrent/Overlapping/CNVs confirmed <i>de novo</i> |
| SK0091-004 | F | MPX    | 22 | 17,265,500  | 21,546,762  | 4,281,262 | gain | CNVs Recurrent/Overlapping                               |
| SK0297-003 | M | SPX-MZ | 22 | 17,265,500  | 21,546,762  | 4,281,263 | gain | CNVs Recurrent/Overlapping/CNVs confirmed <i>de novo</i> |
| SK0323-003 | M | MPX    | 22 | 18,683,900  | 19,427,000  | 743,101   | gain | CNVs Recurrent/Overlapping                               |
| NA0039-000 | F | CHR    | 22 | 46,277,400  | 49,509,100  | 3,231,700 | loss | CNVs confirmed <i>de novo</i>                            |
| SK0123-004 | M | MPX    | 22 | 47,717,300  | 48,318,828  | 601,528   | gain | CNVs Recurrent/Overlapping                               |
| MM0102-003 | M | MPX    | 22 | 48,152,289  | 48,232,669  | 80,380    | loss | CNVs Recurrent/Overlapping                               |
| MM0109-003 | F | SPX    | 22 | 49,243,247  | 49,519,949  | 276,703   | loss | CNVs confirmed <i>de novo</i>                            |
| NA0097-000 | F | CHR    | X  | 34,419      | 5,859,730   | 5,825,312 | loss | CNVs confirmed <i>de novo</i>                            |
| SK0186-004 | M | SPX    | X  | 22,962,800  | 23,119,000  | 156,200   | loss | CNVs that are Singletons                                 |
| MM0087-003 | M | MPX    | X  | 25,516,263  | 25,620,400  | 104,138   | loss | CNVs that are Singletons                                 |
| NA0112-000 | M | SPX    | X  | 38,250,331  | 38,371,333  | 121,003   | gain | CNVs that overlap the ACRD                               |
| NA0100-000 | M | SPX    | X  | 44,395,900  | 45,060,800  | 664,901   | gain | CNVs that are Singletons                                 |
| SK0306-004 | F | SPX    | X  | 48,073,600  | 52,716,966  | 4,643,367 | gain | CNVs confirmed <i>de novo</i>                            |
| SK0087-003 | F | MPX    | X  | 83,866,300  | 92,175,100  | 8,308,800 | loss | CNVs that are Singletons                                 |
| MM0020-004 | M | MPX    | X  | 87,452,050  | 87,595,200  | 143,151   | gain | CNVs that are Singletons                                 |
| SK0228-003 | M | SPX    | X  | 104,153,000 | 104,638,000 | 485,000   | gain | CNVs that are Singletons                                 |
| SK0088-003 | M | SPX    | X  | 114,042,922 | 114,215,435 | 172,513   | gain | CNVs that are Singletons                                 |
| MM0087-003 | M | MPX    | X  | 130,406,000 | 130,695,499 | 289,500   | gain | CNVs that are Singletons                                 |
| NA0016-000 | F | SPX    | X  | 140,600,370 | 140,907,495 | 307,125   | gain | CNVs that are Singletons                                 |
| SK0234-003 | M | MPX    | X  | 142,561,000 | 142,682,000 | 121,000   | loss | CNVs that are Singletons                                 |
| SK0320-003 | M | MPX    | X  | 143,059,574 | 143,399,300 | 339,727   | gain | CNVs that are Singletons                                 |
| SK0123-004 | M | MPX    | X  | 147,974,000 | 148,479,449 | 505,449   | gain | CNVs that are Singletons                                 |
